1 **JMJD6 Cleaves MePCE to Release P-TEFb**

2

3 Schuyler Lee<sup>1,2,\*</sup>, Haolin Liu<sup>1,2,\*</sup>, Ryan Hill<sup>3</sup>, Xia Hong<sup>1,2</sup>, Xinjian Liu<sup>4</sup>, Fran Crawford<sup>1</sup>,  
4 Qianqian Zhang<sup>5</sup>, Molly Kingsley<sup>6,7</sup>, Zhongzhou Chen<sup>5</sup>, Andreas Lengeling<sup>8</sup>, Kathrin  
5 Bernet<sup>6,7</sup>, Philippa Marrack<sup>1,2</sup>, John Kappler<sup>1,2</sup>, Kirk Hansen<sup>3</sup>, Qiang Zhou<sup>9</sup>, Chuan-Yuan  
6 Li<sup>4</sup>, Gongyi Zhang<sup>1,2,#</sup>

7

8 <sup>1</sup>Department of Biomedical Research, National Jewish Health, Denver, CO 80206, USA.

9 <sup>2</sup>Department of Immunology and Microbiology, School of Medicine, University of  
10 Colorado Denver, Aurora, CO 80216, USA. <sup>3</sup>Department of Genetics and Biochemistry,

11 School of Medicine, University of Colorado Denver, Aurora, CO 80216, USA.

12 <sup>4</sup>Department of Dermatology, Duke University, Durham, NC 27710. <sup>5</sup>State Key  
13 Laboratory of Agrobiotechnology, China Agriculture University, Beijing 1000193,

14 People's Republic of China; <sup>6</sup>Department of Pediatrics and the center for Child Cancer  
15 Research, Children's Hospital of Philadelphia, Philadelphia, PA 10104, USA. <sup>7</sup>Perelman

16 School of Medicine, University of Pennsylvania, Philadelphia, PA 10104, USA. <sup>8</sup>Max-  
17 Planck-Society, Administrative Headquarters, Hofgartenstr. 8, 80539, Munich, Germany.

18 <sup>9</sup>Department of Molecular and Cell Biology, University of California, Berkeley, CA  
19 94720, USA

20

21 \*Contributed equally

22 #Correspondent author: Gongyi Zhang, [zhangg@njhealth.org](mailto:zhangg@njhealth.org)

23 [Data has been deposited: 6MEV](#)

24 **Abstract**

25 More than 30% of genes in higher eukaryotes are regulated by promoter-proximal pausing  
26 of RNA polymerase II (Pol II). Phosphorylation of Pol II-CTD by positive transcription  
27 elongation factor (P-TEFb) is a necessary precursor event that enables productive  
28 transcription elongation. The exact mechanism on how the sequestered P-TEFb is released  
29 from the 7SK snRNP complex and recruited to Pol II-CTD remains unknown. In this  
30 report, we reveal methylphosphate capping enzyme (MePCE), a core component of the  
31 7SK snRNP complex, as the cognate substrate for Jumonji domain-containing 6 (JMJD6)'s  
32 novel proteolytic function. Our evidences consist of a crystal structure of JMJD6 bound to  
33 methyl-arginine, enzymatic assays of JMJD6 cleaving MePCE *in vivo* and *in vitro*, binding  
34 assays, and downstream effects of *Jmjd6* knockout and overexpression on Pol II-CTD  
35 phosphorylation. We propose that JMJD6 assists bromodomain containing 4 (BRD4) to  
36 recruit P-TEFb to Pol II-CTD by disrupting the 7SK snRNP complex.

## 37 **Introduction**

38 Mechanisms of transcription regulation in bacteria are very well established;  
39 transcription factors bind to specific DNA to recruit RNA Polymerases (RNAP) to carry  
40 out transcription (Ptashne and Gann 1997, Zhang, Campbell et al. 1999). In eukaryotes,  
41 however, there are additional layers of regulation such as the nucleosome structures, which  
42 could prevent RNA Polymerases including RNA Polymerase I (Pol I), RNA Polymerase II  
43 (Pol II), and RNA Polymerase III (Pol III) from productive transcription due to high  
44 binding affinity between DNA and histones. Precisely how RNA Polymerases overcome  
45 nucleosomal barriers to undergo a productive transcription elongation and how Pol II  
46 pausing is regulated remain unanswered (Zhou, Li et al. 2012, Jonkers and Lis 2015, Core  
47 and Adelman 2019). In higher eukaryotes, over ~30% genes are regulated by Pol II  
48 promoter-proximal pausing (Core, Waterfall et al. 2008, Nechaev, Fargo et al. 2010, Min,  
49 Waterfall et al. 2011), which is resultant from nucleosome barriers at +1 position of  
50 transcription start sites (Gilchrist, Dos Santos et al. 2010, Weber, Ramachandran et al.  
51 2014, Voong, Xi et al. 2016). We recently discovered that a group of JmjC domain  
52 containing protein family including JMJD5 and JMJD7 specifically cleave histone tails and  
53 potentially generate tailless nucleosomes. The cleavage activity by JMJD5 and JMJD7  
54 could be associated with the release of the promoter-proximal paused Pol II and trigger Pol  
55 II into productive elongation in higher eukaryotes, such as mouse and human (Liu, Wang  
56 et al. 2017, Liu, Wang et al. 2018). The cleavage activity of JMJD5 on histone tails was  
57 also independently reported by another group (Shen, Xiang et al. 2017), thus cross-  
58 validating our respective discoveries.

59           Compared to efficient recruitment of P-TEFb (including CDK9 and Cyclin T1) by  
60 TAT protein in human immunodeficiency virus (HIV)(Peterlin, Brogie et al. 2012), BRD4  
61 is claimed to be responsible for the recruitment P-TEFb to the promoters of Pol II pausing  
62 regulated genes (Jang, Mochizuki et al. 2005, Yang, Yik et al. 2005, AJ, Bugai et al. 2016).  
63 However, the binding affinity between BRD4 and P-TEFb ( $\sim 0.5\mu\text{M}$ ) (Itzen, Greifenberg  
64 et al. 2014) is much weaker than that that of TAT and P-TEFb ( $\sim 3\text{nM}$ ) (Wei, Garber et al.  
65 1998, Tahirov, Babayeva et al. 2010, Schulze-Gahmen, Lu et al. 2014), and BRD4 is  
66 lacking a RNA binding motif (Wu et al. 2007). Therefore, we hypothesize there must exist  
67 another factor to help BRD4 to recruit P-TEFb and engages in the instigation of Pol II  
68 transcription elongation. Besides the classic Bromo-domains which recognize acetylated  
69 histone tails, BRD4 contains an extra terminal domain (ET) recognizing JMJD6 (Rahman,  
70 Sowa et al. 2011, Konuma, Yu et al. 2017). Incidentally, we found that JMJD6  
71 nonspecifically binds to single stranded RNA with high affinity ( $\sim 40\text{nM}$ )(Hong, Zang et  
72 al. 2010). We propose that JMJD6 may be recruited by both BRD4 and newly transcribed  
73 RNAs from Pol II to help BRD4 recruit P-TEFb, acting analogously to that of TAT protein  
74 associating with both P-TEFb and TAR.

75           JMJD6 is one of the most controversial proteins in biology (Vangimalla, Ganesan  
76 et al. 2017). It was first cloned as phosphatidylserine (PS) receptor (Fadok, Bratton et al.  
77 2000), but was corrected as a nucleus expressed protein unrelated to PS (Bose, Gruber et  
78 al. 2004, Cikala, Alexandrova et al. 2004, Cui, Qin et al. 2004). It was later reported to  
79 contain arginine demethylase activity on histone tails (Chang, Chen et al. 2007),  
80 hydroxylase activity on splicing factor U2AF65 (Webby, Wolf et al. 2009) and histone  
81 tails (Han, Li et al. 2012), and both arginine demethylase activities on histone tails and



82 RNA demethylase activities on 5' prime of 7SK snRNA (Liu, Ma et al. 2013), and  
83 surprisingly PS binding (Neumann, Coakley et al. 2015, Yang, Chen et al. 2015). The exact  
84 or cognate substrate(s) of JMJD6 remains unresolved or controversial. Based on the novel  
85 protease activities of JMJD5 and JMJD7 (Liu, Wang et al. 2017, Shen, Xiang et al. 2017,  
86 Liu, Wang et al. 2018), the high structural similarity among catalytic cores of JMJD5,  
87 JMJD6, and JMJD7 (Hong, Zang et al. 2010, Liu, Wang et al. 2018), and analogous severe  
88 phenotypes among knockouts of *Jmjd5* and *Jmjd6* in mice (Li, Sarkisian et al. 2003, Bose,  
89 Gruber et al. 2004, Ishimura, Minehata et al. 2012, Oh and Janknecht 2012), we  
90 hypothesized that JMJD6 may contain protease activity working on methylated arginines  
91 on some protein candidates which regulate the activity of Pol II, especially promoter-  
92 proximally paused Pol II. In this report, we reveal that methylphosphate capping enzyme  
93 (MePCE) (Jeronimo, Forget et al. 2007, Xue, Yang et al. 2010) of the 7SK snRNP complex  
94 is a cognate substrate of JMJD6.

95

## 96 **JMJD6 has a unique structure to hold methyl-arginine**

97 Based on these divergent reports regarding substrates of JMJD6 (Chang, Chen et  
98 al. 2007, Webby, Wolf et al. 2009, Han, Li et al. 2012, Liu, Ma et al. 2013, Neumann,  
99 Coakley et al. 2015), we re-interrogated proposed substrates using stringent and unified  
100 criteria. As we reported previously, JMJD6 binds with high binding affinity (~40nM) to  
101 single stranded RNA (ssRNA) without sequence specificity (Hong, Zang et al. 2010).  
102 However, truncation analysis showed that JMJD6 barely binds to ssRNA without the C-  
103 terminal flexible region (Hong, Zang et al. 2010). This suggests that the C-terminal domain  
104 of JMJD6 may just serve as ssRNA binding motif and RNAs are not a substrate for the

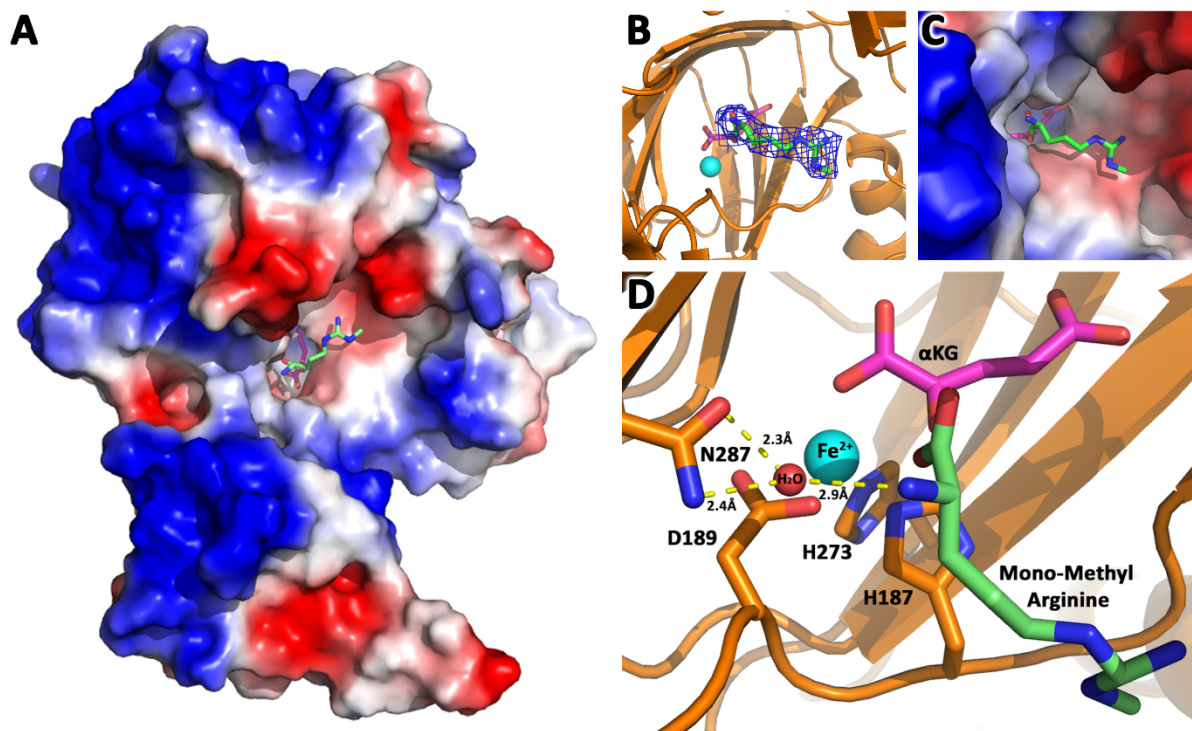

**Figure 1. JMJD6 binds to monomethyl arginine (1-of-4).** **a.** complex structure of JMJD6 (1-343) and monomethyl arginine (MM-Arg). Surface charges were generated using PyMOL (Action > generate > vacuum electrostatics > protein contact potential) (<https://pymol.org/2/>). Red represents negatively-charged surface, Gray represents neutral-charged surface, and Blue represents positively-charged surface. **b.** Omit map 2Fo-Fc electron density of MM-Arg. **c.** Magnified view of MM-Arg in the catalytic center of JMJD6 **d.** Coordination of elements at catalytic center.

105 enzymatic activity of JMJD6. On the other hand, the structure of the catalytic core of  
106 JMJD6 shows some critical similarity to those of JMJD5 and JMJD7, with a negatively  
107 charged microenvironment near the catalytic center (Hong, Zang et al. 2010, Liu, Wang et  
108 al. 2018), suggesting positively charged substrates (Fig. 1). As we reported, JMJD5 and  
109 JMJD7 specifically recognize methylarginines of histone tails *via* a Tudor-domain-like  
110 structure near the catalytic center of JMJD5, which could specifically recognize  
111 methylarginines, but not methyllysine (Liu, Wang et al. 2017, Liu, Wang et al. 2018). We  
112 reasoned that the similar structural features among JMJD6, JMJD5, and JMJD7 may confer  
113 similar substrate for JMJD6 as those of JMJD5 and JMJD7. In this regard, crystals of

114 JMJD6 without C-terminal motif (1-343) were soaked with a monomethylarginine  
115 derivative. Interestingly, four out of eight JMJD6 molecules within an asymmetric unit  
116 bound to monomethylarginine, which coordinates with Fe<sup>2+</sup> and alpha-KG in the catalytic  
117 center similar to that of JMJD5 and methylarginines (Fig. 1, Fig.S1, Fig. S2, Fig. S3, Table  
118 S1). However, the methylated sidechain of arginine is located in a more open catalytic  
119 space containing negatively charged residues, compared to that of JMJD5, indicating that  
120 the pocket could hold more than one sidechain (Fig. 1A). This may suggest a novel  
121 substrate recognition mode, which is different from that of JMJD5 (Liu, Wang et al. 2018).  
122 Nevertheless, the complex structure shows several key evidences. First, JMJD6 does bind  
123 to substrates with methylarginine or possibly methyllysine or both arginine and lysine with  
124 and without methylation (Fig. 1B, 1C). Second, the methyl group is far away from either  
125 the divalent ion or alpha-KG, suggesting JMJD6 may not act as lysine or arginine  
126 demethylases to remove methyl groups on the sidechain of either lysine or arginine. Third,  
127 peptides or proteins could be cognate substrates instead of RNA or DNA, which do not  
128 contain any positive charge with or without methylation. Fourth, the catalytic center  
129 contains analogous residues present in JMJD5 and JMJD7, suggesting a similar novel  
130 catalytic mechanism as those of JMJD5 and JMJD7 through an imidic acid as proton  
131 mediator (Fig. 1D)(Lee, Chen et al. 2017, Liu, Wang et al. 2018). This novelty is  
132 particularly exemplified by the fact that commercially available protease inhibitor cocktail  
133 (Roche) at 2x concentration cannot inhibit activities of JMJD5, JMJD6, and JMJD7.  
134 Furthermore, a comprehensive protein composition analysis using mass spectrometry  
135 (Table S2) of all purified recombinant JMJD6 samples used in the following experiments  
136 could not detect any protease contaminants.

### 137 **JMJD6 cleaves MePCE**

138           Since JMJD5 and JMJD7 make cleavage on histone tails (Liu, Wang et al. 2017),  
139 we asked whether JMJD6 also recognizes histone tails. Interestingly, JMJD6 does in fact  
140 have activities on bulk histone *in vitro* (Fig. S4A). This result may explain why two groups  
141 found that JMJD6 could reduce methylarginine containing histone tails in *in vitro* assays  
142 probed with antibodies (Chang, Chen et al. 2007, Liu, Ma et al. 2013), in which post-cleft  
143 short peptides with methylarginines can not be recognized by antibodies in western blots.  
144 To confirm or rule out whether histone tails are cognate substrates of JMJD6, we first  
145 assessed the binding affinity between JMJD6 and histone peptides with or without arginine  
146 methylation. From fluorescence polarization binding assays, binding affinities between  
147 JMJD6 and peptides are weak and around  $\sim 150\mu\text{M}$  (Fig. S5D, S5E). Most importantly,  
148 with or without *Jmjd6*, the level of arginine methylated histones or overall histone levels  
149 does not change in MEF cells *in vivo* (Fig. S4B), which is in stark contrast to those of  
150 JMJD5 and JMJD7 (Liu, Wang et al. 2017). These data suggest that histone tails are not  
151 cognate substrates of JMJD6. Parenthetically, it is reported that JMJD6 binds to LARP7  
152 on 7SK snRNP (Weimann, Grossmann et al. 2013), works on methyl cap of 5' 7SK snRNA  
153 (Liu, Ma et al. 2013), and binds to BRD4 (Rahman, Sowa et al. 2011, Konuma, Yu et al.  
154 2017), all suggesting a close relation with the 7SK snRNP complex.

155           We hypothesized that JMJD6 may work on some protein component(s) of the 7SK  
156 snRNP to regulate the stability of 7SK snRNP complex. Interestingly, all protein  
157 components of the 7SK snRNP complex including MEPCE, LARP7, and HEXIM1 are  
158 drastically decreased in the MEF cells without *Jmjd6* (Fig. 2A). One possibility is that all  
159 members are transcriptionally regulated by JMJD6. This could be consistent with the

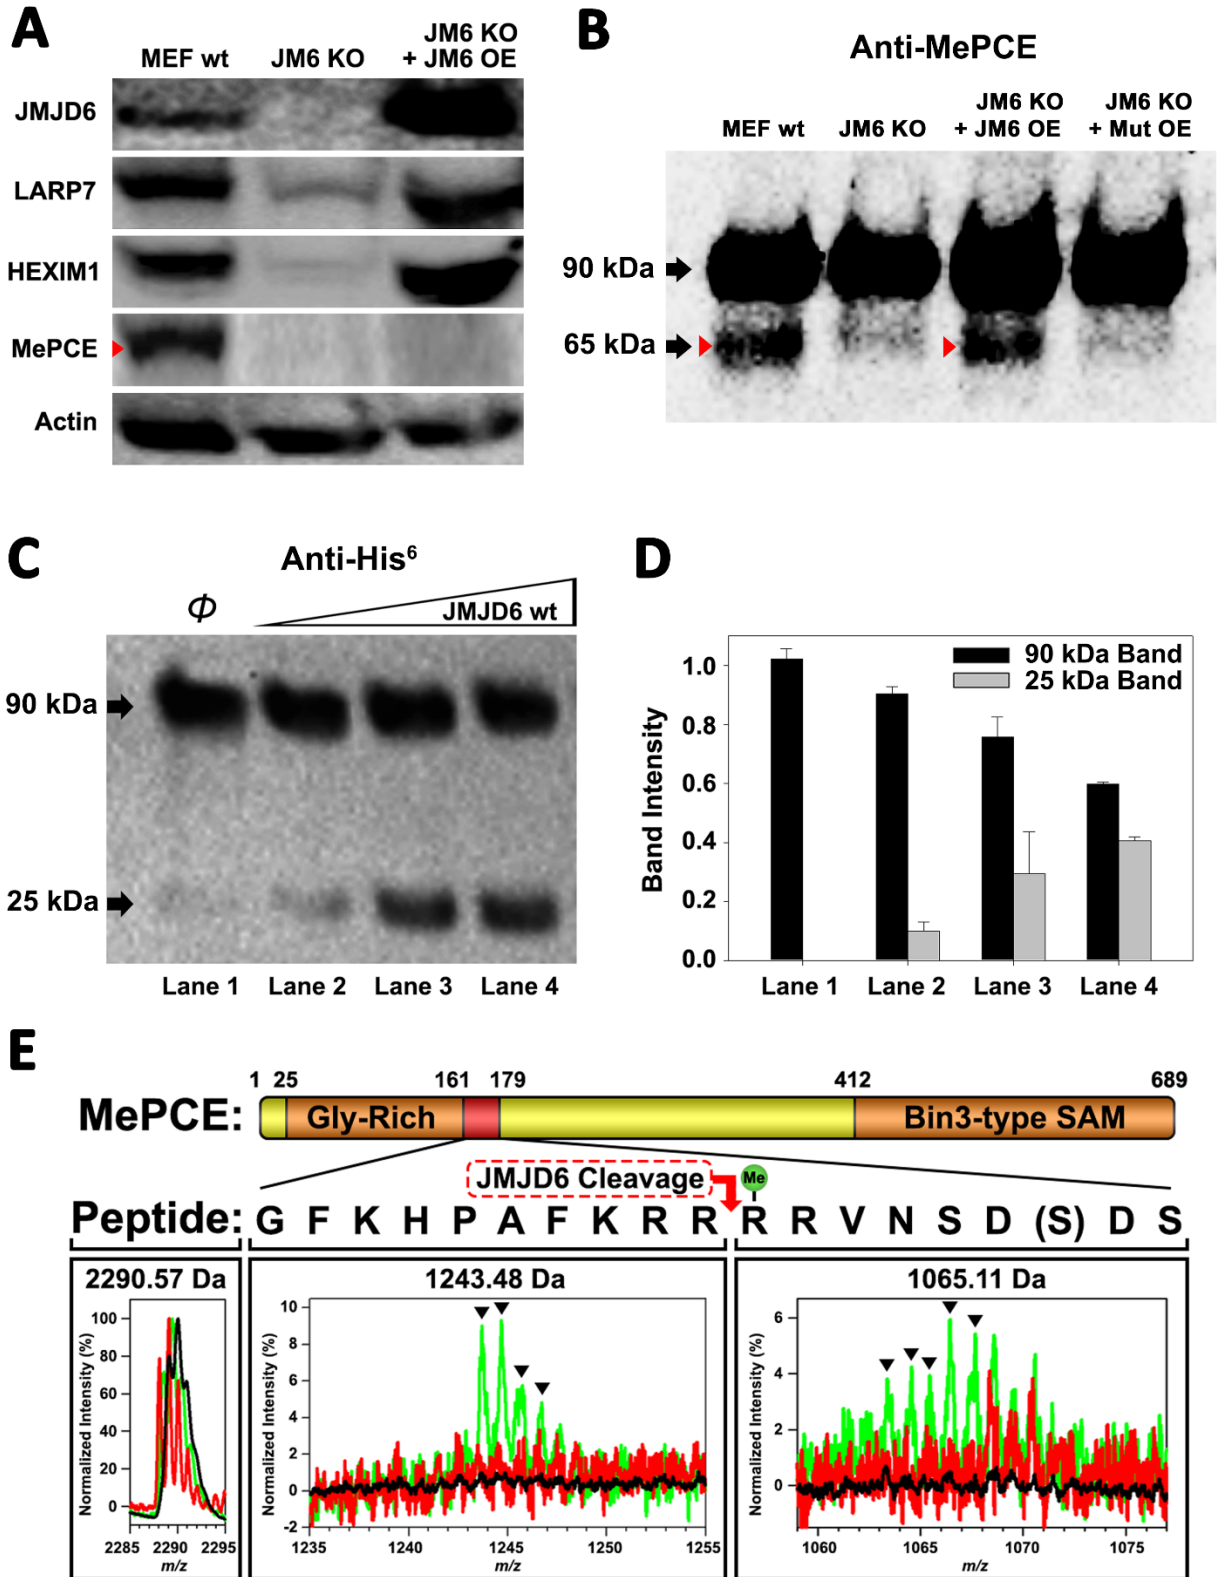

160

**Figure 2. JMJD6 targets MePCE for proteolysis.** **a.** Western blot of wild-type MEF, *Jmjd6* knockout MEF, and JMJD6 overexpression in *Jmjd6* knockout MEF probed with antibodies specific for components of the 7SK snRNP complex; LARP7, HEXIM1, and MePCE. **b.** Western blot of MePCE overexpressed respectively in wild-type MEF, *Jmjd6* knockout MEF, wild-type JMJD6 overexpression in *Jmjd6* knockout MEF, and inactive mutant JMJD6 overexpression in *Jmjd6* knockout MEF; probed with antibody specific for MePCE. **c.** Wild-type JMJD6 titrated into full-length MePCE with N-terminal His<sup>6</sup>-tag. Enzymatic activity of JMJD6 is probed with anti-His<sup>6</sup> antibody. **d.** Quantification of **c.** **e.** The endopeptidase activity of JMJD6 on synthesized MePCE (161-179) R171-me2s/C177S peptide. The mass spectrum is normalized to the intensity of the undigested peptide input. The peptide is assayed with wild-type JMJD6 (green), inactive mutant JMJD6 (red), or peptide alone (black). The MePCE (161-179) peptide with symmetric dimethylation on R171 and C177S mutation has a molecular weight of 2,290.57 Da. After wild-type JMJD6 cleavage between R170 and R171, the major peaks\* (black triangles) with the molecular weight of 1,243.48 Da corresponds to the N-terminal product and the molecular weight of 1,065.11 Da corresponds to the C-terminal product respectively. \*The multiple peaks are isotopic distributions, which are characteristic of MALDI-TOF.

161 severe phenotype of *Jmjd6* knockouts, which results in embryonic lethality and cell growth  
162 retardation and tissue differentiation (Li, Sarkisian et al. 2003, Bose, Gruber et al. 2004),  
163 suggesting that JMJD6 is a global master transcriptional regulator controlling expression  
164 of a large group of genes including components from the 7SK snRNP complex. However,  
165 our RNA-Seq data do not support direct transcriptional downregulation of 7SK snRNP  
166 complex members at mRNA level (Table S3). All of them, including MePCE, LARP7, and  
167 HEXIM1 have similar mRNA levels with or without *Jmjd6*. At the moment, the cause of  
168 this downregulation of proteins level of these components from 7SK snRNP remains  
169 unresolved and is beyond the scope of this report. However, when we introduce back  
170 JMJD6 via overexpression into MEF cells lacking *Jmjd6*, protein levels of LARP7 and  
171 HEXIM1 are rescued, whereas MePCE is not (Fig. 2A). To account for this disappearance  
172 of MePCE, we hypothesized that overexpression of JMJD6 may directly target MEPCE  
173 for degradation. To confirm this hypothesis, we respectively overexpressed full-length  
174 MePCE in wild-type MEF, *Jmjd6* knockout MEF, wild-type JMJD6 overexpression in



175 *Jmjd6* knockout MEF, and inactive mutant JMJD6 overexpression in *Jmjd6* knockout  
176 MEF. The whole cell lysates were probed with anti-MePCE antibody. Our hypothesis was  
177 vindicated with the emergence of a lower molecular weight form of MePCE in wild-type  
178 MEF and wild-type JMJD6 overexpression in *Jmjd6* knockout MEF, whereas the lower  
179 molecular weight form of MePCE was not detectable in the *Jmjd6* knockout MEF, and  
180 inactive mutant JMJD6 overexpression in *Jmjd6* knockout MEF (Fig. 2B).

181 To reproduce these *in vivo* results in an *in vitro* setting, full-length proteins linked  
182 with N-terminal His<sup>6</sup>-tag of MePCE and HEXIM1 were generated from insect cells and  
183 LARP7 and HEXIM2 were generated from bacteria and purified, followed by subjecting  
184 these proteins to direct *in vitro* enzymatic assays. Consistent with our *in vivo* results,  
185 JMJD6 cleaves MePCE *in vitro* (Fig. 2C. 2D), but not HEXIM1, HEXIM2, nor LARP7  
186 (data not shown). Upon cleavage of MePCE by JMJD6 *in vitro*, a band with molecular  
187 weight ~25 kDa was detected by antibody against His<sup>6</sup>-tag at the N-terminal (Fig. 2C). To  
188 provide context, MePCE contains a total of 689 residues and a theoretical molecular weight  
189 of 74.4 kDa, whereas it is detected at ~90 kDa on SDS-PAGE gel due to its high content  
190 of proline residues (10.7%). We expect that the ~25 kDa fragment from N-terminal of  
191 MePCE may contain 200 residues or less due to rich proline residues within the N-terminal  
192 of MePCE (first 150 residues of MePCE contains 27 prolines, 18.0% prolines).  
193 Furthermore, our *in vivo* assay yielded a cleaved MePCE band with a molecular weight  
194 ~65 kDa (Fig. 2B). The anti-MePCE antibody used in this assay was generated using a  
195 peptide immunogen containing residues 200-250 of MePCE. Thus, the ~65 kDa band may  
196 correspond to the cleaved C-terminal segment of MePCE containing the approximate  
197 residues 200-689.

198           Based on the binding of JMJD6 to methylated arginine we obtained from the  
199 complex crystal structure, we reasoned that arginine residues within approximately the first  
200 200 residues of MePCE could contain the recognition site. Several peptide fragments  
201 including residues from 81 to 160, residues 154 to 184, and residues 187 to 244 were  
202 synthesized. Peptides of 81-160 and 187-244 did not show any cleavage when incubated  
203 with JMJD6. Peptides of 154-184 showed cleavage activity, but at levels of <1% compared  
204 to peptide input. We attributed this low activity as a matter of insolubility and dimerization  
205 via C177 oxidation. To overcome this obstacle, a shorter peptide from residue 161 to 179  
206 containing C177S was synthesized and subjected to enzymatic reaction under JMJD6. This  
207 peptide also contains symmetric dimethylation on R171, given that our binding data,  
208 described in the next section, suggests that this particular modification yields the highest  
209 binding affinity (Fig. 3C). In line with our expectations, dominant peaks corresponding to  
210 the cleaved MePCE peptide products were detected by mass spectrometry, but not in either  
211 peptide alone or with an inactive mutant version of JMJD6 (Fig. 2E).

212

### 213 **JMJD6 specifically recognizes methylarginine within MEPCE**

214           To determine the binding affinity between JMJD6 and the newly discerned MePCE  
215 proteolysis site, Microscale Thermophoresis (MST) assay was performed using catalytic  
216 core of JMJD6 (1-343) titrated with the MePCE (154-184) peptide exhibiting: no  
217 modification (Fig. 3A), R170-me2s (Fig. 3B), or R171-me2s (Fig. 3C). The highest binding  
218 affinity was exhibited by the MePCE (154-184)-R171-me2s peptide with  $K_d = 159 \pm 77$   
219 nM, followed by the peptide containing no modification with  $K_d = 471 \pm 292$  nM, and  
220 lastly the peptide with R170-me2s with  $K_d = 568 \pm 316$  nM. Fluorescence polarization



221

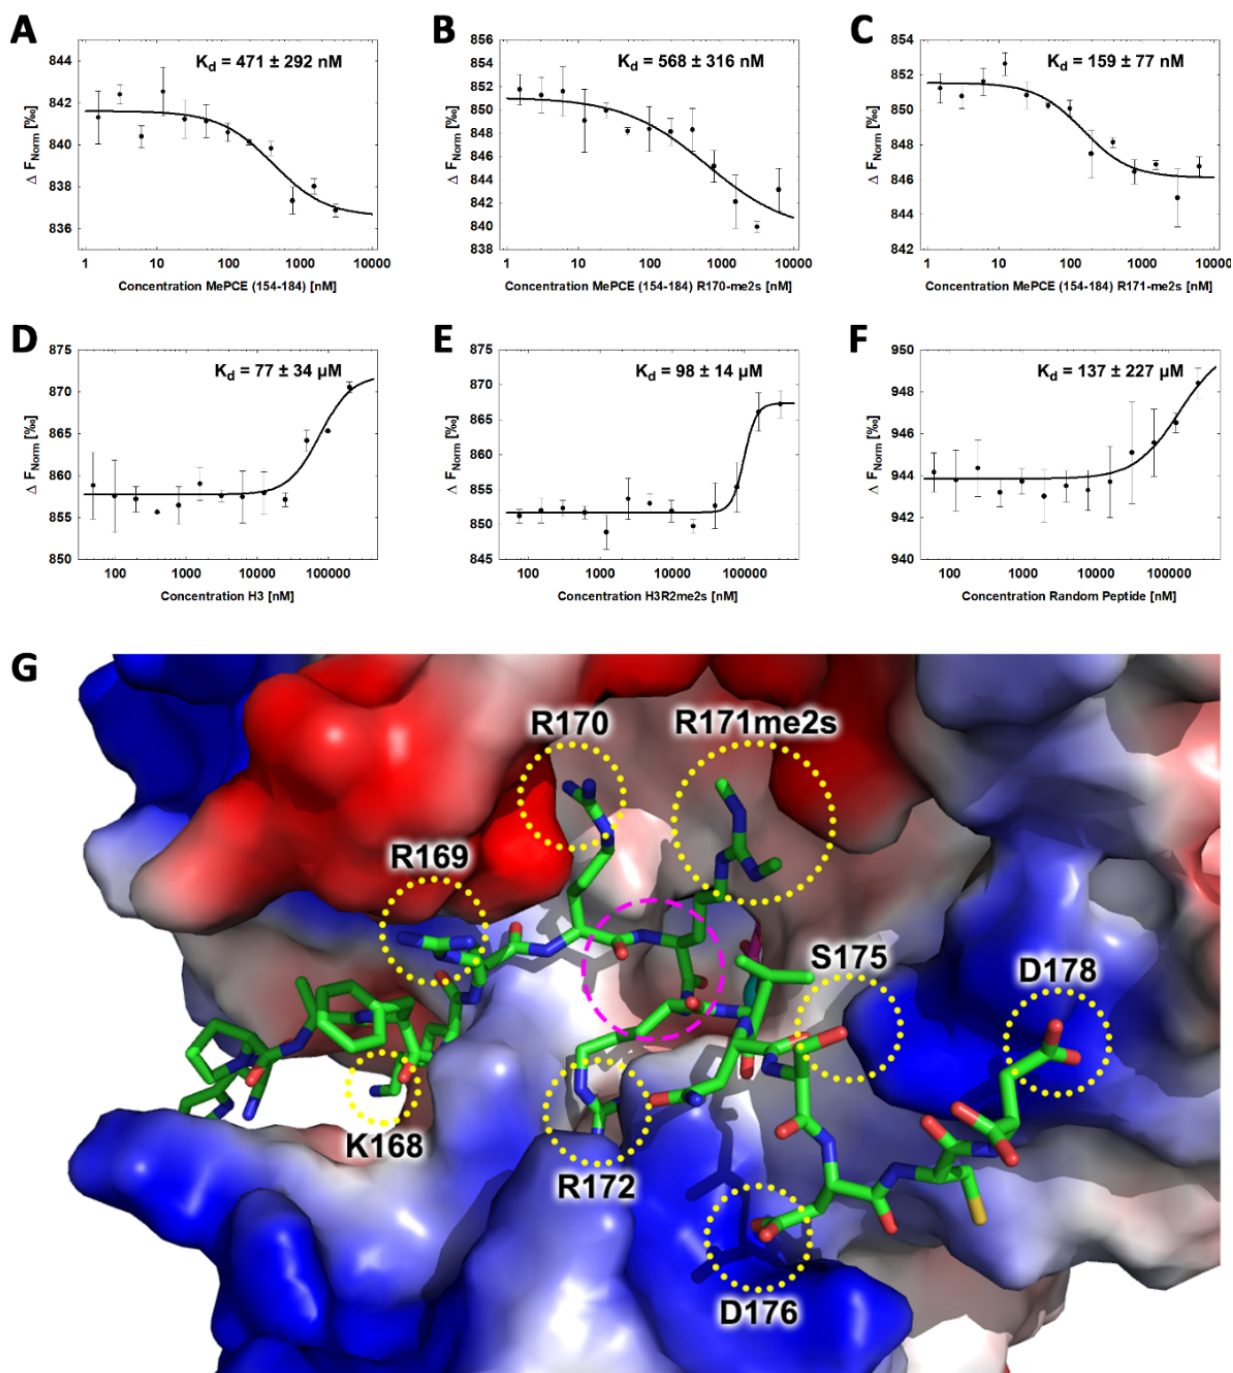

**Figure 3. JMJD6 specifically binds to MePCE site containing residues 164-178 (determined via MST). a.** The binding of His-JMJD6 (1-343) to unmodified MePCE (154-184). **b.** The binding of His-JMJD6 (1-343) to MePCE (154-184) R170-me2s. **c.** The binding of His-JMJD6 (1-343) to MePCE (154-184) R171-me2s. **d.** The binding of His-JMJD6 (1-343) to unmodified Histone 3 (1-21). **e.** The binding of His-JMJD6 (1-343) to Histone 3 (1-16) R2-me2s. **f.** The binding of His-JMJD6 (1-343) to C-peptide (57-87). **g.** Electrostatic interactions between JMJD6 (1-343) and MePCE (164-178) determined by YASARA Energy Minimization server are highlighted in yellow dotted circles and catalytic center is highlighted in magenta dashed circle.

222 assays were used to cross-validate the K<sub>d</sub> values obtained via MST above, all of which  
223 respectively fell within the margin of error (Fig. S5A, A5B, S5C). These data suggest that  
224 methylation on R171 enhances binding nearly 3-fold compared to no modification,  
225 whereas methylation on R170 diminishes binding marginally. Whether or not these  
226 particular methylations occur *in vivo* is yet to be explored. Interestingly, the YASARA  
227 Energy Minimization Server developed by Dr. Kevin Karplus' group yielded a theoretical  
228 model that positions R171 in the identical position to the monomethyl-arginine observed  
229 in our crystal model (Fig. S6A)(Krieger, Joo et al. 2009). Furthermore, the energy-  
230 minimized model displayed 8 separate charge-charge interactions between JMJD6 and  
231 MePCE (Fig. 3G). Although a *bona fide* complex structure is preferred, this computational  
232 model is in excellent agreement with all our findings and provides a coherent justification  
233 for the experimentally observed high binding affinities between JMJD6 and MePCE. To  
234 compare the abovementioned binding affinities to that of JMJD6 and histone tails, as other  
235 groups have previously purported, the identical MST assay was performed using peptides  
236 derived from Histone 3 (1-21) containing no modification (H3) (Fig. 3D), Histone 3 (1-  
237 16)-R2-me2s (H3R2me2s) (Fig. 3E), and C-peptide (57-87) as a negative control (Fig. 3F).  
238 For the Histone 3 peptides, low binding affinity was exhibited with K<sub>d</sub> = 77 ± 34 μM for  
239 H3 peptide and K<sub>d</sub> = 98 ± 14 μM for H3R2me2s peptide. No meaningful binding was  
240 observed for the C-peptide (Fig. 3F).

241

## 242 **Knockout of *Jmjd6* leads to down-regulation of Ser2p-CTD of Pol II**

243 We previously reported that cleavage of histone tails by JMJD5 and JMJD7 could  
244 lead to tailless nucleosomes, which are unstable and are more readily overcome by Pol II

245 during transcription (Liu, Wang et al. 2017, Liu, Wang et al. 2018). What happens when  
 246 MePCE is cleaved? Does MePCE cleavage mediate P-TEFb to be released from the 7SK  
 247 snRNP complex, allowing to be recruited to CTD of Pol II, and then to phosphorylate Ser2-  
 248 CTD of Pol II? Nuclear extracts from both wild type MEFs, *Jmjd6* knockout MEFs and  
 249 JMJD6 overexpression in *Jmjd6*-deficient MEFs were subjected to investigation as to the

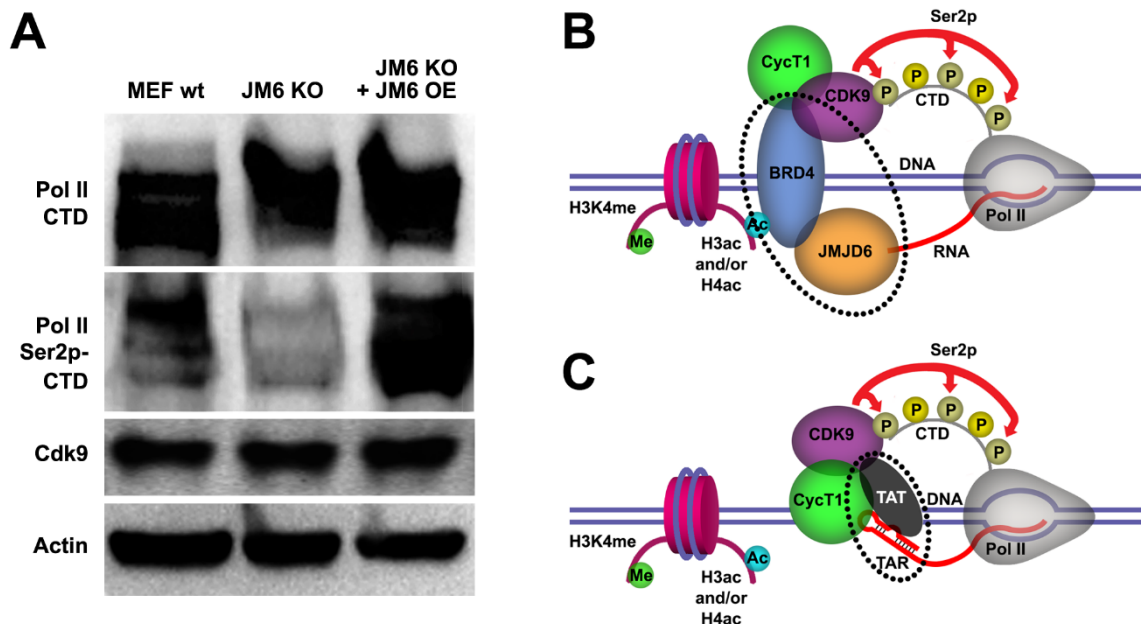

**Figure 4. JMJD6 regulates Pol II Ser2-CTD phosphorylation.** **a.** Western blot of wild-type MEF, *Jmjd6* knockout MEF, and JMJD6 overexpression in *Jmjd6* knockout MEF probed with antibodies specific for Pol II CTD, Pol II ser2p-CTD, and CDK9. **b.** ssRNA-bound JMJD6 and acetylated H3/H4-bound BRD4 in conjunction (black dotted circle) bridges P-TEFb to paused Pol II. **c.** TAR-bound TAT (black dotted circle) bridges P-TEFb to paused Pol II.

250 level of Ser2p-CTD of Pol II. Consistent with all our current and previous findings, Ser2p-  
 251 CTD of Pol II is drastically reduced in samples from MEF cells without *Jmjd6*, despite  
 252 CDK9 levels remaining unchanged, suggesting that Ser2p-CTD of Pol II is regulated by  
 253 JMJD6 (Fig. 4A). This result is consistent with the critical role of JMJD6 in embryonic  
 254 development, which is lethal without *Jmjd6* (Li, Sarkisian et al. 2003, Bose, Gruber et al.  
 255 2004). It explains why growth of MEF cells without *Jmjd6* is severely compromised,

256 similar to those without either *Jmjd5* or *Jmjd7* (Liu, Wang et al. 2017). This data suggests  
257 not only that JMJD6's cleavage of MePCE is essential for P-TEFb to be released from the  
258 7SK snRNP complex and ultimately the phosphorylation of Ser2-CTD of Pol II, but also  
259 further cross-confirms that a species of Ser2p-CTD of Pol II is indeed generated by CDK9.  
260 The content of Ser2p-CTD of Pol II is recovered when JMJD6 is re-expressed (Fig. 4A),  
261 suggesting the direct relation of JMJD6 and phosphorylation of Ser2-CTD of Pol II *in vivo*.  
262 When these results are aggregated with previously published reports, whereby (1) JMJD6  
263 exhibits strong binding affinity to nonspecific ssRNA as we previously reported (Hong,  
264 Zang et al. 2010), (2) JMJD6 associates with BRD4 as reported by others (Rahman, Sowa  
265 et al. 2011, Konuma, Yu et al. 2017), and (3) JMJD6 digests MePCE so as to disrupt the  
266 overall stability of 7SK snRNP complex as highlighted in this report, a model of P-TEFb  
267 transcription regulation unique to higher eukaryotes can be generated: JMJD6 binds to 20-  
268 50 nt newly transcribed 5' prime end of ssRNAs of initiated Pol II of any stimulating genes.  
269 The association between BRD4 and JMJD6 allows BRD4 to bring P-TEFb (CDK9) to close  
270 proximity of CTD of Pol II, allowing for Ser2-CTD phosphorylation (Fig. 4B).  
271 Remarkably, this recruitment of P-TEFb by JMJD6, with the assistance of BRD4, is similar  
272 to that of TAT protein hijacking P-TEFb complex after associating with TAR transcript to  
273 trigger the expression of HIV retroviral genome (Fig. 4C) (Peterlin, Brogie et al. 2012,  
274 Zhou, Li et al. 2012, AJ, Bugai et al. 2016). Here, our observation regarding the direct  
275 relation of JMJD6 and level of Ser2p-CTD of Pol II *in vivo* is corroborated by Liu et al.'s  
276 report, in which 7SK snRNP complex pulled-down through HEXIM1 antibody from  
277 HEK293 cells could be disrupted by JMJD6 *in vitro*, as indicated by the decrease in CDK9

278 levels (Liu, Ma et al. 2013), thus strongly supporting our proposed role of JMJD6 as a  
279 direct disruptor of the 7SK snRNP complex.

280

## 281 **Discussion**

282 It took us nearly two decades to address the structure and function of JMJD6 since  
283 it was first cloned (Fadok, Bratton et al. 2000). During the long journey, based on the  
284 conserved structure of JmjC domain containing family, we pioneered in characterizing the  
285 catalytic core of JMJD2 subfamily, which turned out to be a novel lysine demethylase  
286 (Chen, Zang et al. 2006, Whetstine, Nottke et al. 2006, Chen, Zang et al. 2007). We then  
287 solved the structure of JMJD6 with the help of a monoclonal antibody and discovered its  
288 unique ssRNA binding property almost a decade ago (Hong, Zang et al. 2010). However,  
289 the exact function and its cognate substrate remained a mystery, though several groups  
290 claimed variety of enzymatic activities and substrates in past two decades (Chang, Chen et  
291 al. 2007, Webby, Wolf et al. 2009, Han, Li et al. 2012, Liu, Ma et al. 2013). The accidental  
292 discoveries of novel protease activities of JMJD5 and JMJD7 by our group prompted the  
293 exploration of potential protease activity of JMJD6 (Liu, Wang et al. 2017, Liu, Wang et  
294 al. 2018). The report by Liu et al. helped us to narrow down the potential cognate substrate  
295 within the 7SK snRNP complex (Liu, Ma et al. 2013). Reports of arginine demethylase  
296 activity (Chang, Chen et al. 2007, Liu, Ma et al. 2013) helped us to focus on methylated  
297 arginine as the potential cleavage sites. Thanks to these reports, we identified MePCE to  
298 be the cognate substrate of JMJD6, as well as the potential cleavage site. Numerous lines  
299 of evidence from our current discoveries and other publications corroborates the  
300 authenticity of this conclusion: First, JMJD6 is specifically associated with BRD4 through

301 the ET domain (Rahman, Sowa et al. 2011, Konuma, Yu et al. 2017), while BRD4 is very  
302 well established to recruit P-TEFb to paused Pol II (Yang, Yik et al. 2005, Yang, He et al.  
303 2008). Second, JMJD6 could disrupt the 7SK snRNP complex *in vitro* as reported by Liu  
304 et al. (Liu, Ma et al. 2013). Third, our current discoveries showed that JMJD6 cleaves  
305 MePCE of the 7SK snRNP complex. Fourth, our previous discovery on the non-specific  
306 ssRNA recognition of JMJD6 bridges JMJD6 to the initiated Pol II which generates 20-50  
307 nt long ssRNA (Hong, Zang et al. 2010).

308         The findings that JMJD5 and JMJD7 are in fact proteases was highly unexpected,  
309 and required multiple lines of evidence pursued with great scrutiny. It is quite extraordinary  
310 that a very conserved Jumonji domain containing hydroxylase family should contain a  
311 subfamily which evolutionarily adopted distinctive protease activities, as well as exhibit  
312 several unexpected novelties including the catalysis mechanism involving imidic acid and  
313 both endopeptidase and exopeptidase activities (Lee, Chen et al. 2017, Liu, Wang et al.  
314 2017, Liu, Wang et al. 2018). Indeed, recombinant proteins derived from bacteria have a  
315 high chance of contamination by bacterial proteases, although we exhausted innumerable  
316 means to exclude the possibility of contamination in our assays (Liu, Wang et al. 2017,  
317 Liu, Wang et al. 2018). In this report, the novel protease activity of JMJD6, which cleaves  
318 *before* the methylated arginine, is remarkably distinct to the cleavage *after* the methylated  
319 arginine mediated by JMJD5 and JMJD7 (Liu, Wang et al. 2017, Liu, Wang et al. 2018).  
320 This important piece of evidence supports the claim of JMJD5 and JMJD7 as proteases. It  
321 is extremely unlikely that one batch of proteins we purified was contaminated by one type  
322 of undiscovered protease(s) (cleavage after methylated arginine for JMJD5 and JMJD7)  
323 while another batch of proteins was contaminated by a different type of undiscovered



324 protease(s) (cleavage before methylated arginine for JMJD6), all which respectively have  
325 substrate specificity matching the expected biological profiles of JMJD5/6/7.

326         Based on our current discoveries, we may derive a novel transcription regulation  
327 pathway for genes regulated by promoter-proximate pausing Pol II. First, upon stimulation  
328 of cells, signals will reach specific transcription factors through signal transduction  
329 pathways. With modification or with the help of other partner molecules, these  
330 transcription factors bind to enhancers close to the paused Pol II. These transcription  
331 factors will recruit P300/CBP with the help of H3K4(me1) at enhancer regions, which in  
332 turn acetylates H3 and/or H4 on the same nucleosome bound by P300/CBP through  
333 association with H3K4(me1) to generate acetylated H3 and/or H4 (Fig. 5A). Next, BRD4  
334 is recruited to acetylated H3 and/or H4, and in turn engages with JMJD6 and the initiated  
335 Pol II complex. JMJD6 specifically cleaves MePCE of the 7SK snRNP complex so as to  
336 release the P-TEFb complex containing CDK9 (Fig. 5B). Finally, JMJD6 and BRD4 brings  
337 P-TEFb to close proximity of CTD of Pol II. P-TEFb (CDK9) then phosphorylates Ser2-  
338 CTD of Pol II (Fig. 5C).

339

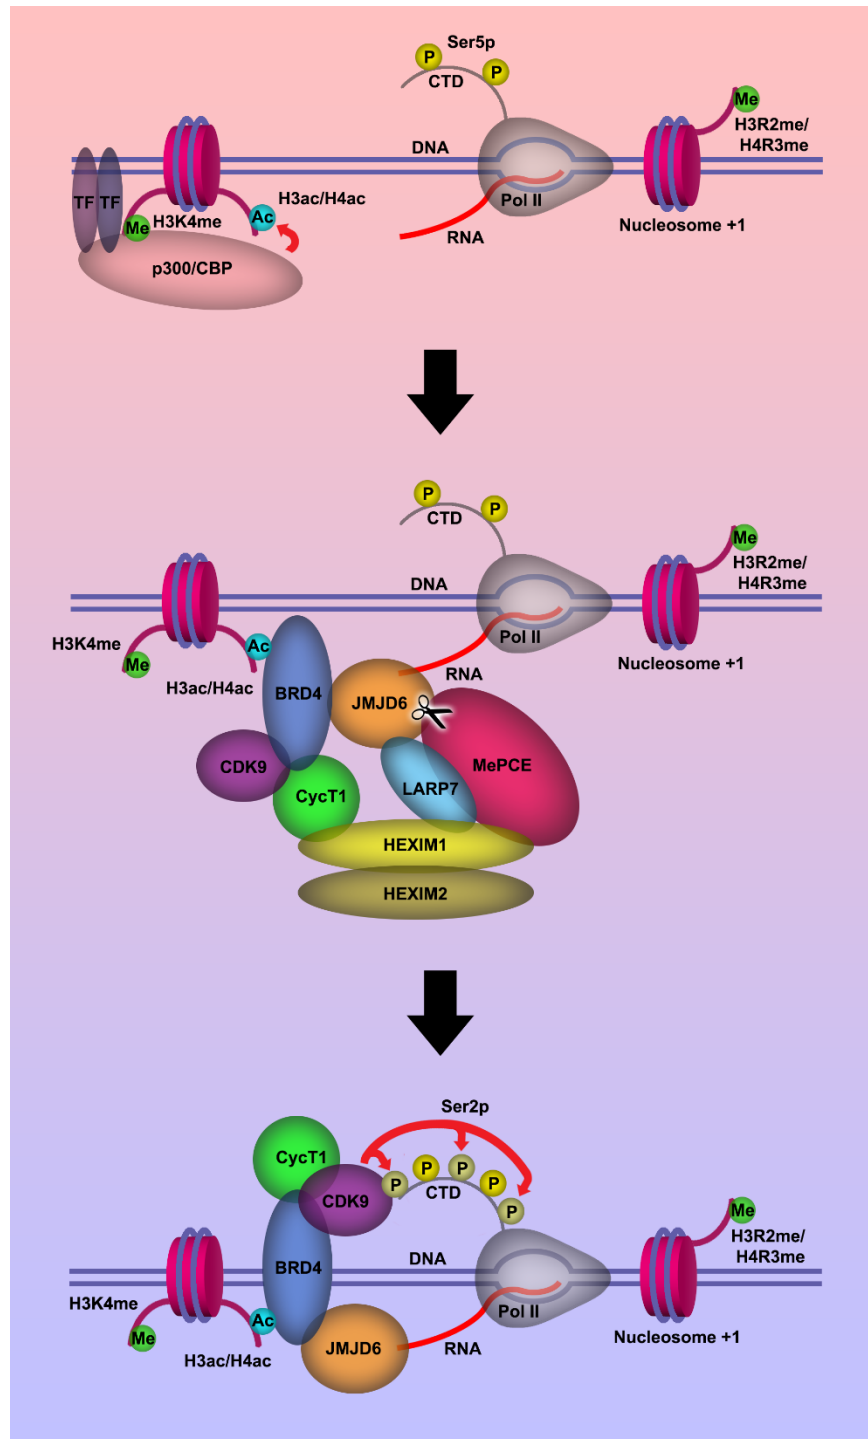

**Figure 5. Model of P-TEFb release from 7SK snRNP complex. a.** Pol II is initiated at the TSS and remains in the paused state until further stimulation. Transcription factors and H3K4me recruits p300/CBP, which acetylates and generates H3ac and/or H4ac. **b.** H3ac and/or H4ac recruits BRD4, which associates with 7SK snRNP/P-TEFb complex and JMJD6. JMJD6 associates with ssRNA from Pol II. JMJD6 digests MePCE to disrupt the 7SK snRNP complex to release P-TEFb (CDK9). **c.** BRD4/JMJD6 brings CDK9 in close proximity of CTD of Pol II. CDK9 phosphorylates Ser2 motifs on CTD of Pol II.



## 340 **Materials and Methods**

341 **Protein expression and purification.** The cDNA corresponding to gene of wild-type  
342 JMJD6 (1-343), inactive mutant JMJD6 (1-343) H187A/D189A/H273A/K204A/N287A,  
343 HEXIM2, and LARP7 was cloned into a pET28a vector containing an N-terminal His<sup>6</sup> tag.  
344 The DNA corresponding to gene of JMJD6 (1-403) wild-type was cloned into a pGEX  
345 vector containing an N-terminal GST tag and TEV linker. All proteins were expressed in  
346 Rosetta (DE3) *Escherichia coli* cells. All cell cultures were grown to A<sub>600</sub> value equal to  
347 about 1.0 and induced with a final concentration of 1.0 mM isopropyl 1-thio-β-D-  
348 galactopyranoside overnight at 16°C. Cells were resuspended in nickel-binding buffer  
349 (50mM Tris-HCl, pH8.0, 1M NaCl, 1mM PMSF) and lysed using a sonicator (Fisher  
350 Scientific Sonic Dismembrator Model 500) at 35% power, 10 sec ON, 5 sec OFF, for 20  
351 min. The lysate was centrifuged at 16,000 rpm at 4°C for 30 min. The supernatant  
352 corresponding to His-JMJD6 (1-343) was loaded to 7mL of Ni-NTA resin (GE Healthcare),  
353 washed with nickel-binding buffer containing 20mM imidazole, and eluted with nickel-  
354 binding buffer containing 500mM imidazole. The supernatant corresponding to GST-tev-  
355 JMJD6 (1-403) was loaded to 7mL of glutathione agarose resin (Thermo Scientific),  
356 washed with nickel-binding buffer, and eluted with nickel-binding buffer containing  
357 30mM glutathione. All eluted JMJD6 products were concentrated and purified on a  
358 superdex 200 10/300 GL column (GE Healthcare) previously equilibrated with nickel-  
359 binding buffer containing 15mM β-mercaptoethanol. The cDNA fragment encoding full-  
360 length MePCE and HEXIM1 with an N-terminal His-tag was cloned under control of the  
361 polyhedrin promoter into a previously described baculovirus transfer plasmid (Kozono et  
362 al., 1994). Recombinant virus was made by co-transfection into SF9 insect cells

363 (Invitrogen) of the plasmid and BacVector3000 baculovirus DNA (Novagen) using the  
364 calcium phosphate co-precipitation method. High titer virus stock was prepared by  
365 infection of SF9 insect cells. MePCE and HEXIM1 protein was produced by infection of  
366 High Five insect cells (Invitrogen) at high multiplicity of infection. Four days later, the  
367 cells were lysed by sonication in nickel-binding buffer. Lysates were cleared by  
368 centrifugation (20,000 rpm, 60 min) and proteins were purified from the supernatant using  
369 7mL of Ni-NTA resin (GE Healthcare). The protein was eluted from the column with  
370 nickel-binding buffer containing 500mM imidazole.

371

#### 372 **Crystallization, Data Collection, structural determination, and refinement of JMJD6.**

373 His-JMJD6 (1-343) was crystallized by vapor diffusion in sitting drops with 0.1M sodium  
374 citrate pH 5.6, 1.0M ammonium phosphate monobasic at 8°C. The crystals were soaked in  
375 soaking buffer; 0.1M sodium citrate pH 5.6, 1.0M ammonium phosphate monobasic,  
376 10mM mono-methyl arginine, 3.75mM  $\alpha$ KG, 3.75mM Iron(II) sulfate. For data collection,  
377 His-JMJD6 (1-343) crystals were transferred to a cryo-protecting buffer (soaking buffer  
378 supplemented with 25% glycerol (v/v)) and frozen in liquid nitrogen. All data used in  
379 structure solving and refinement were collected on a beam line 4.2.2 (MBC-ALS) at the  
380 Advanced Light Source (Berkeley, ALS, USA). Data were integrated and scaled using the  
381 HKL2000 suite of programs. Structural determination and refinement results are shown in  
382 Table S1.

383

384 **Western blot analysis.** To analyze protein levels, wild-type MEF, *Jmjd6* knockout (KO)  
385 MEF, wild-type JMJD6 overexpression in *Jmjd6* KO MEF, inactive mutant JMJD6

386 overexpression in *Jmjd6* KO MEF, and MePCE overexpression in MEF cells were grown  
387 on 10 cm plates to be harvested and lysed using a standard RIPA buffer mixed with  
388 cOmplete Protease inhibitor cocktail (Roche). MEFs were generated from *Jmjd6*<sup>tm1.1Gbf</sup>  
389 knockout mice as previously described (PMID: 15345036, PMID: 21060799). Total  
390 cellular extracts in the presence of a protein standard (Bio-rad) were resolved by 8-12%  
391 gradient SDS-PAGE and transferred to a 0.22  $\mu$ m nitrocellulose membrane and incubated  
392 with specific antibodies overnight at 4°C. Antibodies used in this investigation were: Anti-  
393 JMJD6 (Santa Cruz Biotechnology, sc-28348), Anti-LARP7 (Abcam, ab-134757), Anti-  
394 HEXIM1 (Santa Cruz Biotechnology, sc-390059), Anti-MePCE (Bethyl Laboratories Inc.,  
395 A304-184A), Anti-Actin (Santa Cruz Biotechnology, sc-8432), Anti-His (Santa Cruz  
396 Biotechnology, sc-533073), Anti-Pol II CTD (Gift from Dr. David Bentley), Anti-Pol II  
397 Ser2p-CTD (Gift from Dr. David Bentley), and Anti-CDK9 (Santa Cruz Biotechnology sc-  
398 13130).

399

400 ***In vitro* MePCE cleavage assay.** Full-length MePCE protein with N-terminal His-tag,  
401 mixed with EDTA-free cOmplete protease inhibitor (Roche),  $\alpha$ KG, Zn<sup>2+</sup>, and HEPES pH  
402 6.5, was titrated with recombinant wild-type JMJD6 and placed in 37 °C for 2 hours. The  
403 reaction was subject to western blot analysis using monoclonal anti-His antibody (Santa  
404 Cruz Biotechnology, sc-533073). The reaction was reproduced in two separate experiments  
405 and the blot bands were quantified using ImageJ.

406

407 **Mass Spectrometry.** MePCE (161-179) R171-me2s/C177S peptide, mixed with EDTA-  
408 free cOmplete protease inhibitor (Roche),  $\alpha$ KG, Zn<sup>2+</sup>, and HEPES pH 6.5, was treated with

409 recombinant wild-type JMJD6, inactive mutant JMJD6, or peptide alone and placed in 37  
410 °C for 2 hours. 1  $\mu$ L of reaction sample is mixed with 1  $\mu$ L of  $\alpha$ -cyano-4-hydroxycinnamic  
411 acid (10 mg/ml in 50% ACN, 0.1% TFA). The mixture is spotted on the MALDI target and  
412 allowed to air dry. The sample is analyzed by a Microflex-LRF mass spectrometer (Bruker  
413 Daltonics, Billerica, MA) in positive ion reflector mode. External calibration is done using  
414 a peptide calibration mixture (4 to 6 peptides) on a spot adjacent to the sample. The raw  
415 data is processed in the FlexAnalysis software (version 3.4.7, Bruker Daltonics) and  
416 exported in mzXML format. The mzXML files were analyzed on ProteoWizard. Data  
417 points were normalized to the intensity of the undigested peptide input and plotted on  
418 SigmaPlot v11.0. The reaction was reproduced in three separate experiments.

419

420 **Fluorescence Polarization experiment.** Given the known structure of JMJD6, where  
421 aromatic residues are present in close proximity to the binding pocket (Y131, F133, W174,  
422 W272), the following tryptophan fluorescence assay was deemed suitable for  
423 characterizing various peptide binding activity. All the regular and methylated peptides  
424 were synthesized by AnaSpec Inc. (Histone 3) or Peptide 2.0 Inc. (MePCE). 5  $\mu$ M JMJD6  
425 (1-343) was titrated and equilibrated with fixed concentrations of each peptide  
426 respectively, incubated at 25°C for 30 min between each titration intervals, and subject to  
427 fluorescence measurement. The buffer used in the fluorescence quenching assay was 100  
428 mM NaCl, 20 mM Tris-HCl pH 6.5, and 0.05% Tween-20. The excitation wavelength of  
429 280 nm and the emission wavelength of 342 nm was used for data collection and recorded  
430 with a Fluoromax-3 spectrometer. The titration samples were prepared and analyzed in  
431 parallel as duplicates, triplicates, or quadruplicates. All values at different titration points

432 were compiled, normalized against the maximum value obtained prior to titration and  
433 averaged. The error bars indicate the normalized minimum and maximum values at any  
434 given titration point. The  $K_D$  for each peptide was calculated by fitting to a 4 parameter  
435 sigmoidal dose-response curve with SigmaPlot v11.0.

436

437 **Microscale Thermophoresis (MST) experiment.** His-JMJD6 (1-343) labeled with  
438 fluorescent NT-647 dye at a constant concentration of 100 nM was mixed with sixteen  
439 serial dilutions (~1.5nM–300 $\mu$ M) of peptides derived from MePCE (154-187), MePCE  
440 (154-184) R170-me2s, MePCE (154-184) R171-me2s, Histone 3 (1-21), Histone 3 (1-16)  
441 R2me2s, C-peptide (57-87). C-Peptide (57-87) was used as a negative control. MST  
442 experiment was performed using Monolith NT.115 (NanoTemper Technologies). His-  
443 JMJD6 (1-343) was titrated with peptides in PBS-T buffer (137 mM NaCl, 2.7 mM KCl,  
444 10mM Na<sub>2</sub>HPO<sub>4</sub>, 1.8mM KH<sub>2</sub>PO<sub>4</sub>, and 0.05% Tween-20). The change in the  
445 fluorescence of bound and unbound labeled His-JMJD6 (1-343),  $\Delta F$ , is indicative of the  
446 peptide binding. Plotting  $\Delta F$  vs. peptide concentration facilitated the generation the  
447 dissociation curves, computed by the NTP program. The  $K_D$ , reflecting the affinity of each  
448 of the peptides for His-JMJD6 (1-343), was obtained. The error bars indicate the  
449 normalized minimum and maximum values at any given titration point. Each experiment  
450 was performed in triplicate or quadruplicate.

451

452 **Modeling of JMJD6(1-343)-MePCE(164-178) interaction.** Crystal structure of JMJD6  
453 (1-343) monomer (PDB:6MEV) sans methylarginine was used as the template to build in  
454 residues corresponding to MePCE (164-178) near the catalytic center of JMJD6 in PyMol.

455 No regard for clashes, bonds, or optimization was considered. Structure was exported in  
456 .pdb format and uploaded to YASARA energy minimization server  
457 (<http://www.yasara.org/minimizationserver.htm>) using default parameters (Krieger, Joo et  
458 al. 2009). Energy-minimized output model was converted to .pdb format and the MePCE  
459 (164-178) residues were minimally adjusted in PyMol to superimpose R171 of MePCE  
460 with the methylarginine observed in the crystal structure (PDB:6MEV).

461

462 **RNA-Seq.** RNAs from wild type MEF cells, MEF cells with *Jmjd6* knockout, and MEF  
463 cells with JMJD6 overexpression cells in *Jmjd6* knockout background, respectively, were  
464 extracted with Trizol reagent (ThermoFisher Scientific). The extracted RNAs were then  
465 sent to Quick biology (Quick Biology, Pasadena) for further mRNA purification using  
466 oligo-d(T) beads. The purified mRNA was then used to build a mRNA library. Mouse  
467 Genome mm10 was used as the reference.

468

469 **Acknowledgement.** We thank Dr. David Price from University of Iowa for cDNAs of  
470 MePCE and HEXIM1/2, samples of 7SK snRNP complex from Dr. Qiang Zhou at UC  
471 Berkeley, Dr. Peter Henson, Dr. James Hagman, Dr. Shaodong Dai, and Dr. Yang Wang,  
472 and Janice White for long time support in this project, and other researchers at National  
473 Jewish Health (NJH) for their kind support. Binding data was obtained from the Biophysics  
474 Core facility at Anschutz Medical Center, University of Colorado at Denver. Mass  
475 spectrometry data was obtained from the Proteomics and Metabolomics facility at  
476 Colorado State University. S.L. is supported by NIH Training grant T32AI007405-28 (to  
477 P. M.). H.L. is partially supported by NIH Training grant 5T32AI074491-07(to J. C.). G.Z.  
478 were partially supported by CA201230 (to K. B.), and NJH bridge fund.

479 **Reference**

- 480 AJ, C. Q., A. Bugai and M. Barboric (2016). "Cracking the control of RNA polymerase  
481 II elongation by 7SK snRNP and P-TEFb." Nucleic Acids Res **44**(16): 7527-7539.
- 482 Bose, J., A. D. Gruber, L. Helming, S. Schiebe, I. Wegener, M. Hafner, M. Beales, F.  
483 Kontgen and A. Lengeling (2004). "The phosphatidylserine receptor has essential  
484 functions during embryogenesis but not in apoptotic cell removal." J Biol **3**(4): 15.
- 485 Chang, B., Y. Chen, Y. Zhao and R. K. Bruick (2007). "JMJD6 is a histone arginine  
486 demethylase." Science **318**(5849): 444-447.
- 487 Chen, Z., J. Zang, J. Kappler, X. Hong, F. Crawford, Q. Wang, F. Lan, C. Jiang, J.  
488 Whetstine, S. Dai, K. Hansen, Y. Shi and G. Zhang (2007). "Structural basis of the  
489 recognition of a methylated histone tail by JMJD2A." Proc Natl Acad Sci U S A  
490 **104**(26): 10818-10823.
- 491 Chen, Z., J. Zang, J. Whetstine, X. Hong, F. Davrazou, T. G. Kutateladze, M. Simpson, Q.  
492 Mao, C. H. Pan, S. Dai, J. Hagman, K. Hansen, Y. Shi and G. Zhang (2006). "Structural  
493 insights into histone demethylation by JMJD2 family members." Cell **125**(4): 691-  
494 702.
- 495 Cikala, M., O. Alexandrova, C. N. David, M. Proschel, B. Stiening, P. Cramer and A.  
496 Bottger (2004). "The phosphatidylserine receptor from Hydra is a nuclear protein  
497 with potential Fe(II) dependent oxygenase activity." BMC Cell Biol **5**: 26.
- 498 Core, L. and K. Adelman (2019). "Promoter-proximal pausing of RNA polymerase II:  
499 a nexus of gene regulation." Genes Dev.
- 500 Core, L. J., J. J. Waterfall and J. T. Lis (2008). "Nascent RNA sequencing reveals  
501 widespread pausing and divergent initiation at human promoters." Science  
502 **322**(5909): 1845-1848.
- 503 Cui, P., B. Qin, N. Liu, G. Pan and D. Pei (2004). "Nuclear localization of the  
504 phosphatidylserine receptor protein via multiple nuclear localization signals." Exp  
505 Cell Res **293**(1): 154-163.
- 506 Fadok, V. A., D. L. Bratton, D. M. Rose, A. Pearson, R. A. Ezekewitz and P. M. Henson  
507 (2000). "A receptor for phosphatidylserine-specific clearance of apoptotic cells."  
508 Nature **405**(6782): 85-90.
- 509 Gilchrist, D. A., G. Dos Santos, D. C. Fargo, B. Xie, Y. Gao, L. Li and K. Adelman (2010).  
510 "Pausing of RNA polymerase II disrupts DNA-specified nucleosome organization to  
511 enable precise gene regulation." Cell **143**(4): 540-551.
- 512 Han, G., J. Li, Y. Wang, X. Li, H. Mao, Y. Liu and C. D. Chen (2012). "The hydroxylation  
513 activity of Jmjd6 is required for its homo-oligomerization." J Cell Biochem **113**(5):  
514 1663-1670.
- 515 Hong, X., J. Zang, J. White, C. Wang, C. H. Pan, R. Zhao, R. C. Murphy, S. Dai, P. Henson,  
516 J. W. Kappler, J. Hagman and G. Zhang (2010). "Interaction of JMJD6 with single-  
517 stranded RNA." Proc Natl Acad Sci U S A **107**(33): 14568-14572.
- 518 Ishimura, A., K. Minehata, M. Terashima, G. Kondoh, T. Hara and T. Suzuki (2012).  
519 "Jmjd5, an H3K36me2 histone demethylase, modulates embryonic cell proliferation  
520 through the regulation of Cdkn1a expression." Development **139**(4): 749-759.
- 521 Itzen, F., A. K. Greifenberg, C. A. Bosken and M. Geyer (2014). "Brd4 activates P-TEFb  
522 for RNA polymerase II CTD phosphorylation." Nucleic Acids Res **42**(12): 7577-7590.



523 Jang, M. K., K. Mochizuki, M. Zhou, H. S. Jeong, J. N. Brady and K. Ozato (2005). "The  
524 bromodomain protein Brd4 is a positive regulatory component of P-TEFb and  
525 stimulates RNA polymerase II-dependent transcription." *Mol Cell* **19**(4): 523-534.  
526 Jeronimo, C., D. Forget, A. Bouchard, Q. Li, G. Chua, C. Poitras, C. Therien, D. Bergeron,  
527 S. Bourassa, J. Greenblatt, B. Chabot, G. G. Poirier, T. R. Hughes, M. Blanchette, D. H.  
528 Price and B. Coulombe (2007). "Systematic analysis of the protein interaction  
529 network for the human transcription machinery reveals the identity of the 7SK  
530 capping enzyme." *Mol Cell* **27**(2): 262-274.  
531 Jonkers, I. and J. T. Lis (2015). "Getting up to speed with transcription elongation by  
532 RNA polymerase II." *Nat Rev Mol Cell Biol* **16**(3): 167-177.  
533 Konuma, T., D. Yu, C. Zhao, Y. Ju, R. Sharma, C. Ren, Q. Zhang, M. M. Zhou and L. Zeng  
534 (2017). "Structural Mechanism of the Oxygenase JMJD6 Recognition by the  
535 Extraterminal (ET) Domain of BRD4." *Sci Rep* **7**(1): 16272.  
536 Krieger, E., K. Joo, J. Lee, J. Lee, S. Raman, J. Thompson, M. Tyka, D. Baker and K.  
537 Karplus (2009). "Improving physical realism, stereochemistry, and side-chain  
538 accuracy in homology modeling: Four approaches that performed well in CASP8."  
539 *Proteins* **77 Suppl 9**: 114-122.  
540 Lee, S., Z. Chen and G. Zhang (2017). "Catching Sirtuin-2 Intermediates One  
541 Structure at the Time." *Cell Chem Biol* **24**(3): 248-249.  
542 Li, M. O., M. R. Sarkisian, W. Z. Mehal, P. Rakic and R. A. Flavell (2003).  
543 "Phosphatidylserine receptor is required for clearance of apoptotic cells." *Science*  
544 **302**(5650): 1560-1563.  
545 Liu, H., C. Wang, S. Lee, Y. Deng, M. Wither, S. Oh, F. Ning, C. Dege, Q. Zhang, X. Liu, A.  
546 M. Johnson, J. Zang, Z. Chen, R. Janknecht, K. Hansen, P. Marrack, C. Y. Li, J. W.  
547 Kappler, J. Hagman and G. Zhang (2017). "Clipping of arginine-methylated histone  
548 tails by JMJD5 and JMJD7." *Proc Natl Acad Sci U S A* **114**(37): E7717-E7726.  
549 Liu, H., C. Wang, S. Lee, F. Ning, Y. Wang, Q. Zhang, Z. Chen, J. Zang, J. Nix, S. Dai, P.  
550 Marrack, J. Hagman, J. Kappler and G. Zhang (2018). "Specific Recognition of  
551 Arginine Methylated Histone Tails by JMJD5 and JMJD7." *Sci Rep* **8**(1): 3275.  
552 Liu, W., Q. Ma, K. Wong, W. Li, K. Ohgi, J. Zhang, A. Aggarwal and M. G. Rosenfeld  
553 (2013). "Brd4 and JMJD6-associated anti-pause enhancers in regulation of  
554 transcriptional pause release." *Cell* **155**(7): 1581-1595.  
555 Min, I. M., J. J. Waterfall, L. J. Core, R. J. Munroe, J. Schimenti and J. T. Lis (2011).  
556 "Regulating RNA polymerase pausing and transcription elongation in embryonic  
557 stem cells." *Genes Dev* **25**(7): 742-754.  
558 Nechaev, S., D. C. Fargo, G. dos Santos, L. Liu, Y. Gao and K. Adelman (2010). "Global  
559 analysis of short RNAs reveals widespread promoter-proximal stalling and arrest of  
560 Pol II in *Drosophila*." *Science* **327**(5963): 335-338.  
561 Neumann, B., S. Coakley, R. Giordano-Santini, C. Linton, E. S. Lee, A. Nakagawa, D. Xue  
562 and M. A. Hilliard (2015). "EFF-1-mediated regenerative axonal fusion requires  
563 components of the apoptotic pathway." *Nature* **517**(7533): 219-222.  
564 Oh, S. and R. Janknecht (2012). "Histone demethylase JMJD5 is essential for  
565 embryonic development." *Biochem Biophys Res Commun* **420**(1): 61-65.  
566 Peterlin, B. M., J. E. Brogie and D. H. Price (2012). "7SK snRNA: a noncoding RNA that  
567 plays a major role in regulating eukaryotic transcription." *Wiley Interdiscip Rev*  
568 *RNA* **3**(1): 92-103.

569 Ptashne, M. and A. Gann (1997). "Transcriptional activation by recruitment." Nature  
570 **386**(6625): 569-577.

571 Rahman, S., M. E. Sowa, M. Ottinger, J. A. Smith, Y. Shi, J. W. Harper and P. M. Howley  
572 (2011). "The Brd4 extraterminal domain confers transcription activation  
573 independent of pTEFb by recruiting multiple proteins, including NSD3." Mol Cell  
574 Biol **31**(13): 2641-2652.

575 Schulze-Gahmen, U., H. Lu, Q. Zhou and T. Alber (2014). "AFF4 binding to Tat-P-  
576 TEFb indirectly stimulates TAR recognition of super elongation complexes at the  
577 HIV promoter." Elife **3**: e02375.

578 Shen, J., X. Xiang, L. Chen, H. Wang, L. Wu, Y. Sun, L. Ma, X. Gu, H. Liu, L. Wang, Y. N.  
579 Yu, J. Shao, C. Huang and Y. E. Chin (2017). "JMJD5 cleaves monomethylated histone  
580 H3 N-tail under DNA damaging stress." EMBO Rep **18**(12): 2131-2143.

581 Tahirov, T. H., N. D. Babayeva, K. Varzavand, J. J. Cooper, S. C. Sedore and D. H. Price  
582 (2010). "Crystal structure of HIV-1 Tat complexed with human P-TEFb." Nature  
583 **465**(7299): 747-751.

584 Vangimalla, S. S., M. Ganesan, K. K. Kharbanda and N. A. Osna (2017). "Bifunctional  
585 Enzyme JMJD6 Contributes to Multiple Disease Pathogenesis: New Twist on the Old  
586 Story." Biomolecules **7**(2).

587 Voong, L. N., L. Xi, A. C. Sebeson, B. Xiong, J. P. Wang and X. Wang (2016). "Insights  
588 into Nucleosome Organization in Mouse Embryonic Stem Cells through Chemical  
589 Mapping." Cell **167**(6): 1555-1570 e1515.

590 Webby, C. J., A. Wolf, N. Gromak, M. Dreger, H. Kramer, B. Kessler, M. L. Nielsen, C.  
591 Schmitz, D. S. Butler, J. R. Yates, 3rd, C. M. Delahunty, P. Hahn, A. Lengeling, M. Mann,  
592 N. J. Proudfoot, C. J. Schofield and A. Bottger (2009). "Jmjd6 catalyses lysyl-  
593 hydroxylation of U2AF65, a protein associated with RNA splicing." Science  
594 **325**(5936): 90-93.

595 Weber, C. M., S. Ramachandran and S. Henikoff (2014). "Nucleosomes are context-  
596 specific, H2A.Z-modulated barriers to RNA polymerase." Mol Cell **53**(5): 819-830.

597 Wei, P., M. E. Garber, S. M. Fang, W. H. Fischer and K. A. Jones (1998). "A novel CDK9-  
598 associated C-type cyclin interacts directly with HIV-1 Tat and mediates its high-  
599 affinity, loop-specific binding to TAR RNA." Cell **92**(4): 451-462.

600 Weimann, M., A. Grossmann, J. Woodsmith, Z. Ozkan, P. Birth, D. Meierhofer, N.  
601 Benlasfer, T. Valovka, B. Timmermann, E. E. Wanker, S. Sauer and U. Stelzl (2013). "A  
602 Y2H-seq approach defines the human protein methyltransferase interactome." Nat  
603 Methods **10**(4): 339-342.

604 Whetstone, J. R., A. Nottke, F. Lan, M. Huarte, S. Smolikov, Z. Chen, E. Spooner, E. Li, G.  
605 Zhang, M. Colaiacovo and Y. Shi (2006). "Reversal of Histone Lysine Trimethylation  
606 by the JMJD2 Family of Histone Demethylases." Cell.

607 Xue, Y., Z. Yang, R. Chen and Q. Zhou (2010). "A capping-independent function of  
608 MePCE in stabilizing 7SK snRNA and facilitating the assembly of 7SK snRNP."  
609 Nucleic Acids Res **38**(2): 360-369.

610 Yang, H., Y. Z. Chen, Y. Zhang, X. Wang, X. Zhao, J. I. Godfroy, 3rd, Q. Liang, M. Zhang,  
611 T. Zhang, Q. Yuan, M. Ann Royal, M. Driscoll, N. S. Xia, H. Yin and D. Xue (2015). "A  
612 lysine-rich motif in the phosphatidylserine receptor PSR-1 mediates recognition and  
613 removal of apoptotic cells." Nat Commun **6**: 5717.

- 614 Yang, Z., N. He and Q. Zhou (2008). "Brd4 recruits P-TEFb to chromosomes at late  
615 mitosis to promote G1 gene expression and cell cycle progression." Mol Cell Biol  
616 **28**(3): 967-976.
- 617 Yang, Z., J. H. Yik, R. Chen, N. He, M. K. Jang, K. Ozato and Q. Zhou (2005).  
618 "Recruitment of P-TEFb for stimulation of transcriptional elongation by the  
619 bromodomain protein Brd4." Mol Cell **19**(4): 535-545.
- 620 Zhang, G., E. A. Campbell, L. Minakhin, C. Richter, K. Severinov and S. A. Darst (1999).  
621 "Crystal structure of *Thermus aquaticus* core RNA polymerase at 3.3 Å resolution."  
622 Cell **98**(6): 811-824.
- 623 Zhou, Q., T. Li and D. H. Price (2012). "RNA polymerase II elongation control." Annu  
624 Rev Biochem **81**: 119-143.

## JMJD6 Cleaves MePCE to Release P-TEFb

Schuyler Lee<sup>1,2,\*</sup>, Haolin Liu<sup>1,2,\*</sup>, Ryan Hill<sup>3</sup>, Xia Hong<sup>1,2</sup>, Xinjian Liu<sup>4</sup>, Fran Crawford<sup>1</sup>, Qianqian Zhang<sup>5</sup>, Molly Kingsley<sup>6,7</sup>, Zhongzhou Chen<sup>5</sup>, Andreas Lengeling<sup>8</sup>, Kathrin Bernet<sup>6,7</sup>, Philippa Marrack<sup>1,2</sup>, John Kappler<sup>1,2</sup>, Kirk Hansen<sup>3</sup>, Qiang Zhou<sup>9</sup>, Chuan-Yuan Li<sup>4</sup>, Gongyi Zhang<sup>1,2,#</sup>

<sup>1</sup>Department of Biomedical Research, National Jewish Health, Denver, CO 80206, USA.

<sup>2</sup>Department of Immunology and Microbiology, School of Medicine, University of Colorado Denver, Aurora, CO 80216, USA. <sup>3</sup>Department of Genetics and Biochemistry, School of

Medicine, University of Colorado Denver, Aurora, CO 80216, USA. <sup>4</sup>Department of Dermatology,

Duke University, Durham, NC 27710. <sup>5</sup>State Key Laboratory of Agrobiotechnology, China

Agriculture University, Beijing 1000193, People's Republic of China; <sup>6</sup>Department of Pediatrics and the center for Child Cancer Research, Children's Hospital of Philadelphia, Philadelphia, PA

10104, USA. <sup>7</sup>Perelman School of Medicine, University of Pennsylvania, Philadelphia, PA 10104,

USA. <sup>8</sup>Max-Planck-Society, Administrative Headquarters, Hofgartenstr. 8, 80539, Munich,

Germany. <sup>9</sup>Department of Molecular and Cell Biology, University of California, Berkeley, CA 94720, USA

\*Contributed equally

#Correspondent author: Gongyi Zhang, [zhangg@njhealth.org](mailto:zhangg@njhealth.org)

Data has been deposited: 6MEV

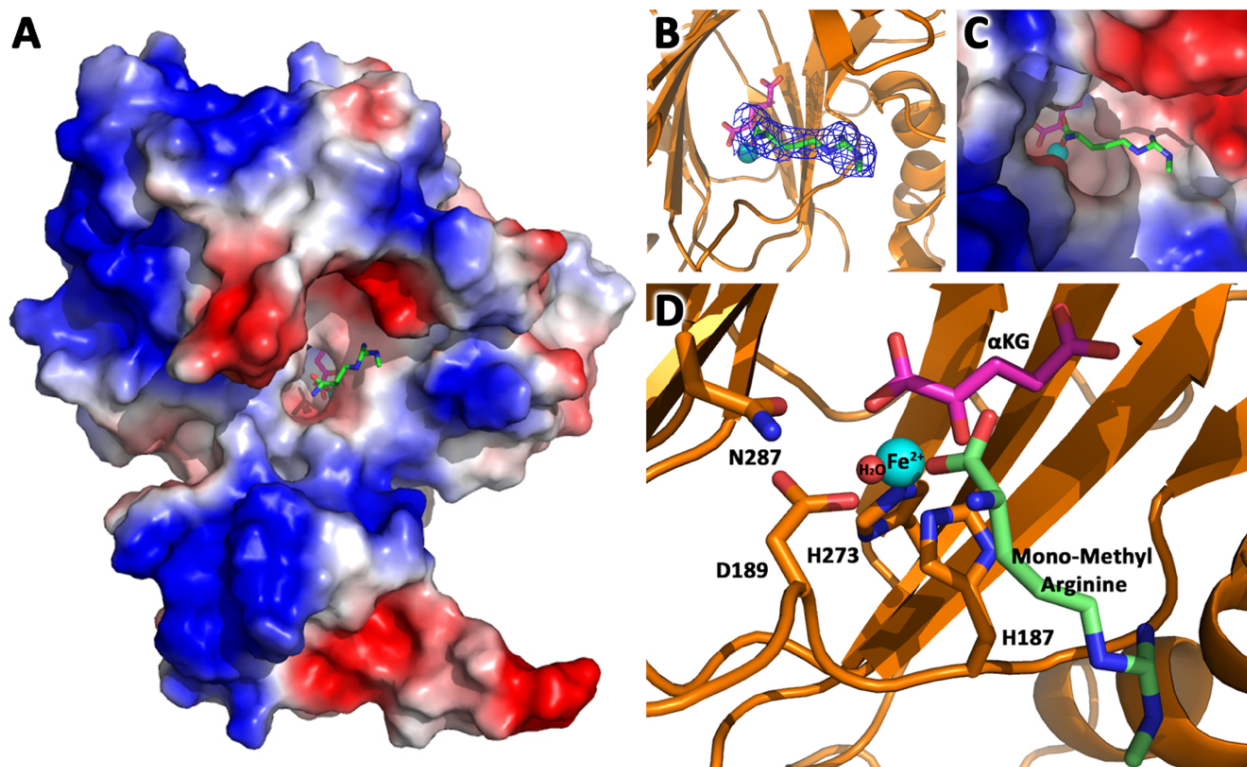

**Figure S1. JMJD6 binds to monomethyl arginine (2-of-4).** **a.** complex structure of JMJD6 (1-343) and monomethyl arginine (MM-Arg). Surface charges were generated using PyMOL (Action > generate > vacuum electrostatics >protein contact potential) (<https://pymol.org/2/>). Red represents negatively-charged surface, Gray represents neutral-charged surface, and Blue represents positively-charged surface. **b.** Omit map 2Fo-Fc electron density of MM-Arg. **c.** Magnified view of MM-Arg in the catalytic center of JMJD6 **d.** Coordination of elements at catalytic center.



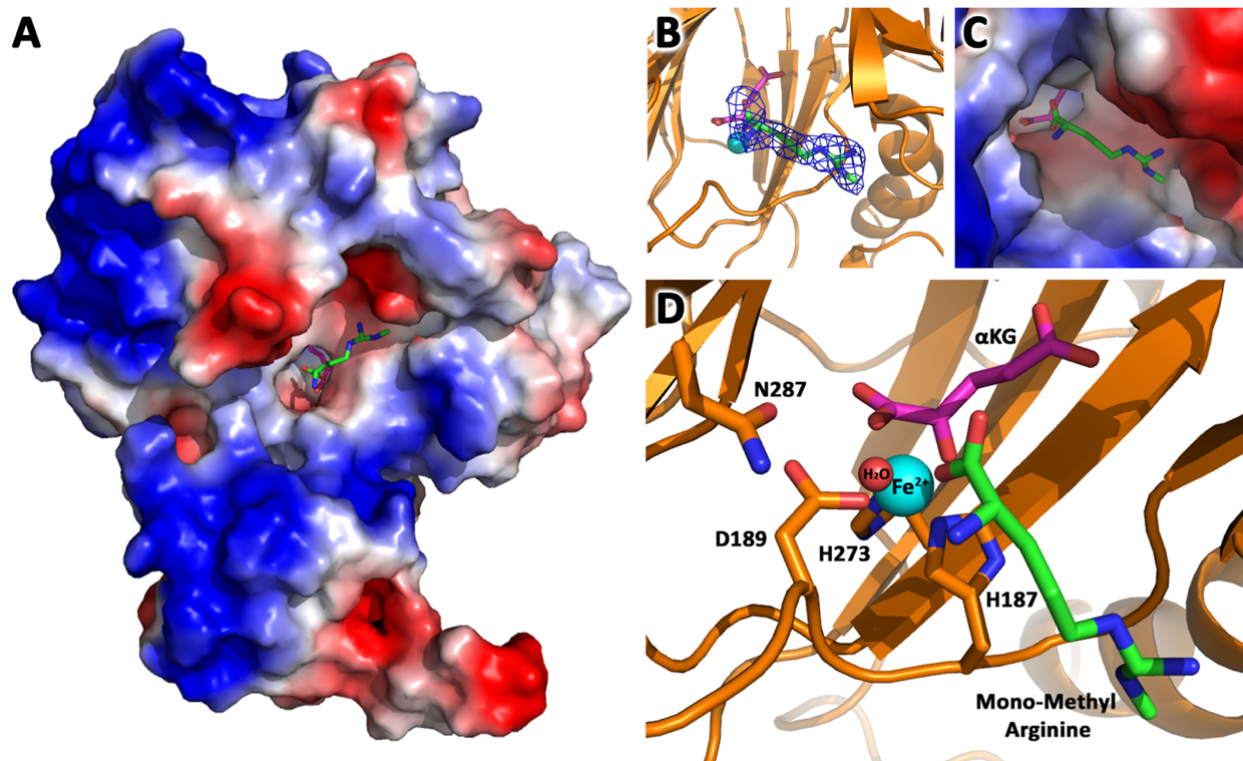

**Figure S2. JMJD6 binds to monomethyl arginine (3-of-4).** **a.** complex structure of JMJD6 (1-343) and monomethyl arginine (MM-Arg). Surface charges were generated using PyMOL (Action > generate > vacuum electrostatics >protein contact potential) (<https://pymol.org/2/>). Red represents negatively-charged surface, Gray represents neutral-charged surface, and Blue represents positively-charged surface. **b.** Omit map 2Fo-Fc electron density of MM-Arg. **c.** Magnified view of MM-Arg in the catalytic center of JMJD6 **d.** Coordination of elements at catalytic center.

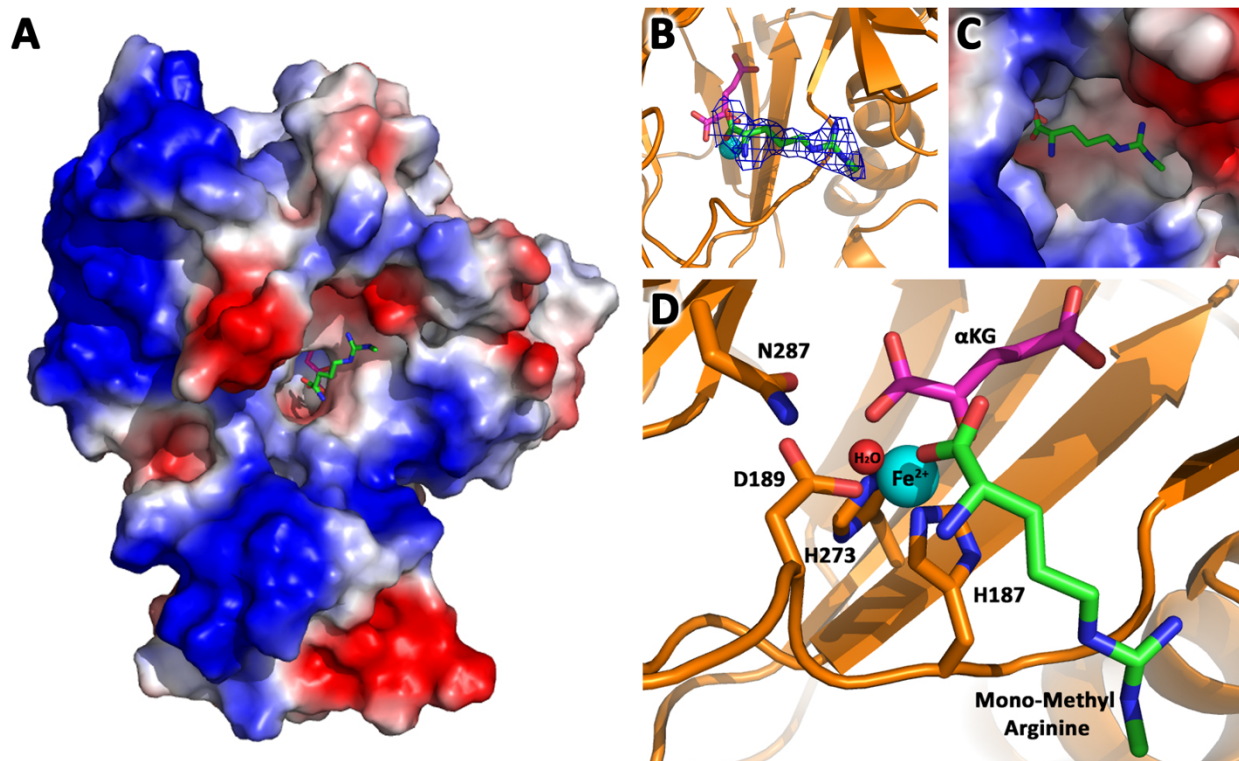

**Figure S3. JMJD6 binds to monomethyl arginine (4-of-4).** **a.** complex structure of JMJD6 (1-343) and monomethyl arginine (MM-Arg). Surface charges were generated using PyMOL (Action > generate > vacuum electrostatics >protein contact potential) (<https://pymol.org/2/>). Red represents negatively-charged surface, Gray represents neutral-charged surface, and Blue represents positively-charged surface. **b.** Omit map 2Fo-Fc electron density of MM-Arg. **c.** Magnified view of MM-Arg in the catalytic center of JMJD6 **d.** Coordination of elements at catalytic center.

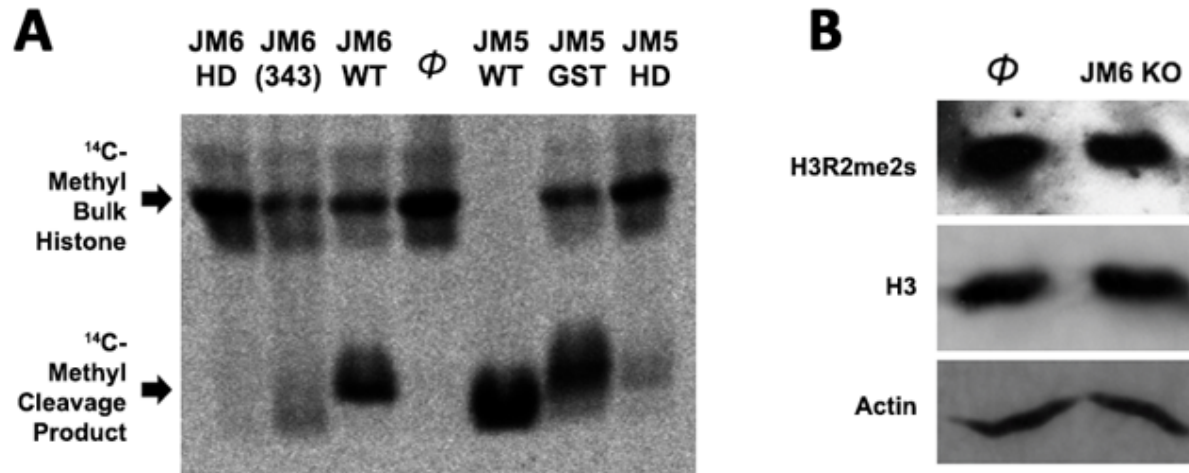

**Figure S4. Histone tails are not the cognate substrate of JMJD6.** **a.**  $^{14}\text{C}$ -labeled bulk histone reaction and resultant cleavage product when treated with JMJD6 and JMJD5 *in vitro*. **b.** JMJD6 knockout has no effect in the content of both arginine methylated H3 and total H3 in MEF cells *in vivo*.

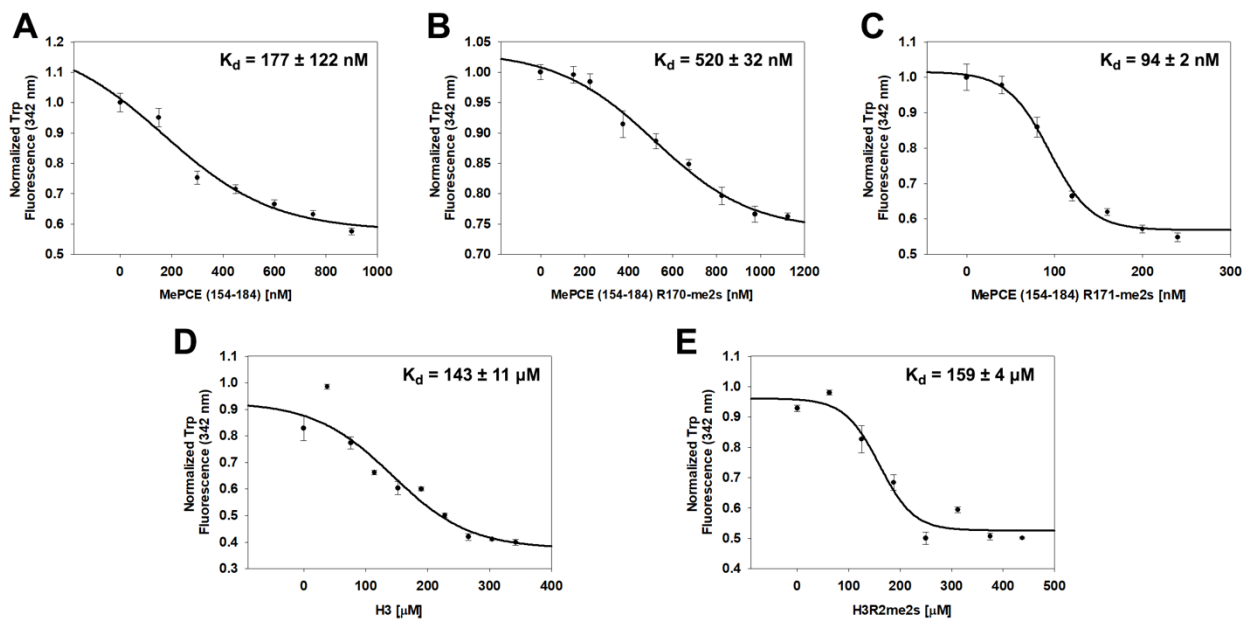

**Figure S5. JMJD6 specifically binds to MePCE site containing residues 164-178 (determined via fluorescence polarization).** **a.** The binding of His-JMJD6 (1-343) to unmodified MePCE (154-184). **b.** The binding of His-JMJD6 (1-343) to MePCE (154-184) R170-me2s. **c.** The binding of His-JMJD6 (1-343) to MePCE (154-184) R171-me2s. **d.** The binding of His-JMJD6 (1-343) to unmodified Histone 3 (1-21). **e.** The binding of His-JMJD6 (1-343) to Histone 3 (1-16) R2-me2s.



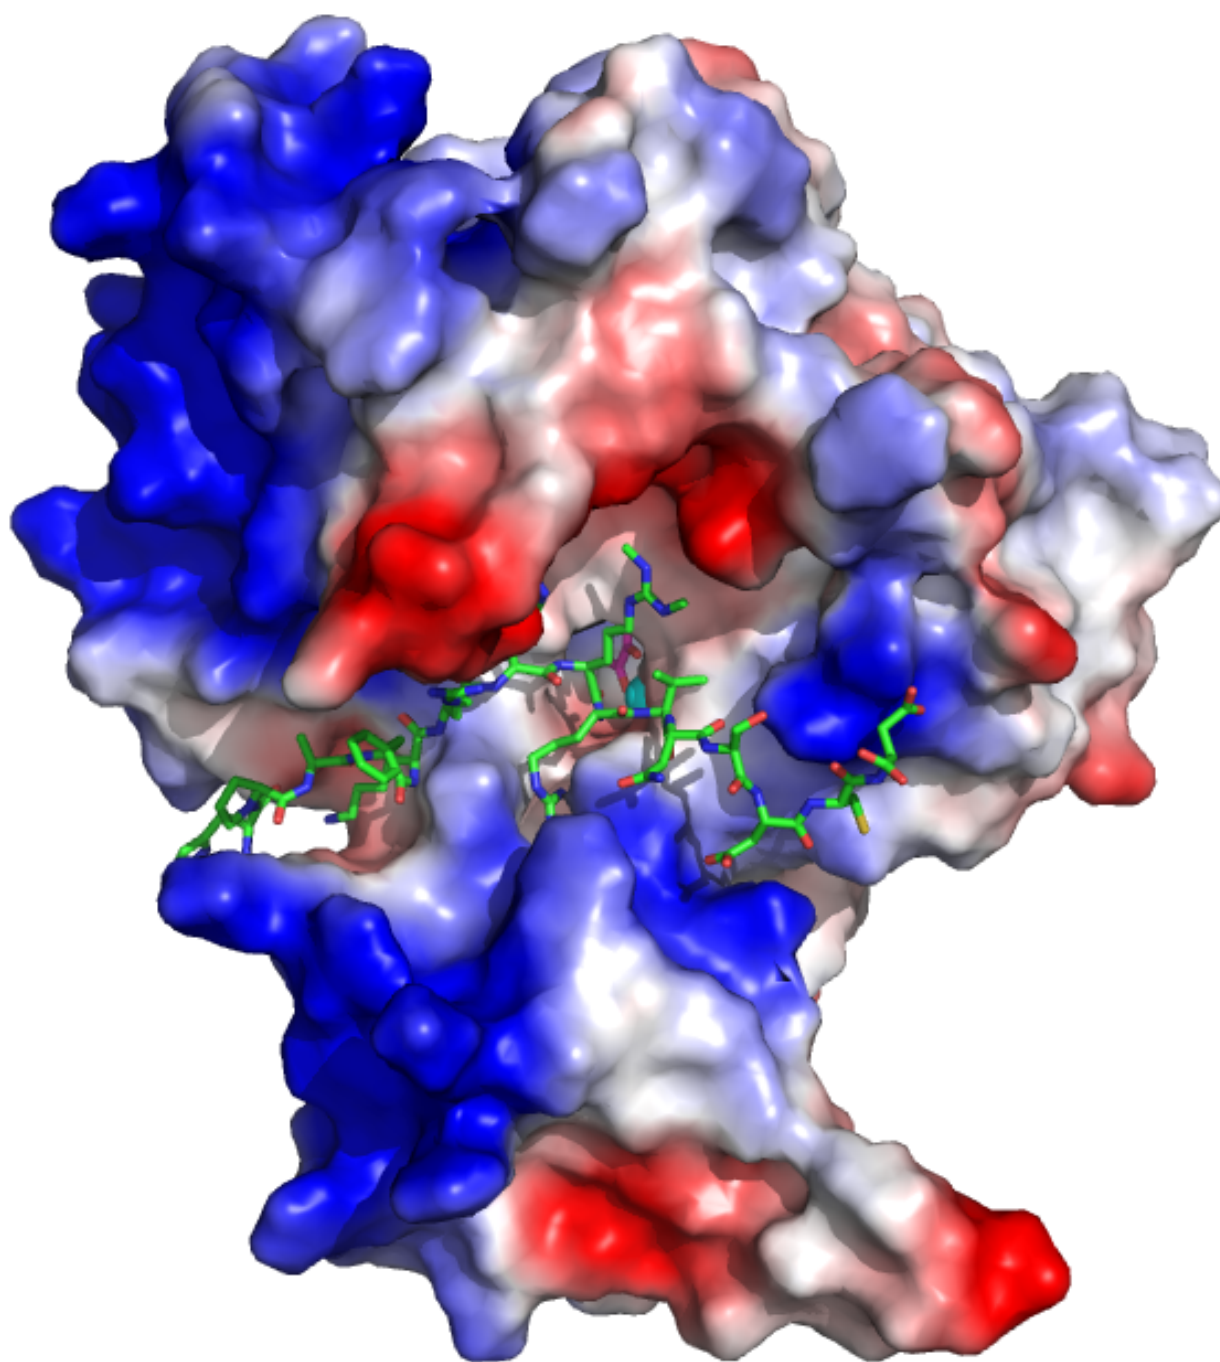

**Figure S6. Computational complex structure model of JMJD6 (1-343) and MePCE (164-178) derived from YASARA Energy Minimization server.** Minor spatial adjustments were made on R171me2s of computational model to better overlap with experimental model.

**Table S1. Crystallographic statistics of complex structure of JMJD6 and a methylated arginine.**

|                                | JM6     |         |         |                 |
|--------------------------------|---------|---------|---------|-----------------|
| Wavelength                     |         |         |         |                 |
| Resolution range               | 64      | -       | 2.6     | (2.693 - 2.6)   |
| Space group                    |         |         |         | P 1 21 1        |
| Unit cell                      | 100.547 | 141.906 | 149.263 | 90 96.797 90    |
| Total reflections              |         |         |         | 490209 (45163)  |
| Unique reflections             |         |         |         | 127739 (12429)  |
| Multiplicity                   |         |         |         | 3.8 (3.5)       |
| Completeness (%)               |         |         |         | 0.99 (1.00)     |
| Mean I/sigma(I)                |         |         |         | 8.36 (1.01)     |
| Wilson B-factor                |         |         |         | 40.17           |
| R-merge                        |         |         |         | 0.2198 (1.542)  |
| R-meas                         |         |         |         | 0.2557 (1.825)  |
| CC1/2                          |         |         |         | 0.976 (0.33)    |
| CC*                            |         |         |         | 0.994 (0.705)   |
| Reflections used in refinement |         |         |         | 126596 (12425)  |
| Reflections used for R-free    |         |         |         | 1999 (197)      |
| R-work                         |         |         |         | 0.2291 (0.3130) |
| R-free                         |         |         |         | 0.2872 (0.3466) |
| CC(work)                       |         |         |         | 0.924 (0.666)   |
| CC(free)                       |         |         |         | 0.861 (0.559)   |
| Number of non-hydrogen atoms   |         |         |         | 23285           |
| macromolecules                 |         |         |         | 22527           |
| ligands                        |         |         |         | 88              |
| Protein residues               |         |         |         | 2716            |
| RMS(bonds)                     |         |         |         | 0.012           |
| RMS(angles)                    |         |         |         | 1.36            |
| Ramachandran favored (%)       |         |         |         | 97              |
| Ramachandran allowed (%)       |         |         |         | 3.2             |
| Ramachandran outliers (%)      |         |         |         | 0.22            |
| Rotamer outliers (%)           |         |         |         | 2.8             |
| Clashscore                     |         |         |         | 16.88           |
| Average B-factor               |         |         |         | 44.31           |
| macromolecules                 |         |         |         | 44.48           |
| ligands                        |         |         |         | 33.41           |
| solvent                        |         |         |         | 39.97           |

**Table S2. Protein Composition Analysis via Mass Spectrometry.** Bacteria expressed and purified JMJD6 are subjected to mass spectrum analysis, all potential contaminated trace protein candidates are listed. No known protease candidate is identified from the list.

**Table S3. Total RNA-seq reads of wild-type MEF, JMJD6 knockout MEF, and JMJD6 overexpressed in JMJD6 KO background MEF.**
